# Supplementary material for: Regulatory genome annotation of 33 insect species
Source: eLife. 2024 Oct 11;13:RP96738. doi: 10.7554/eLife.96738 (PMC11469670; doi:10.7554/eLife.96738)
Supplement: Figure 4—source data 1. [file elife-96738-fig4-data1.xlsx]

## Sheet: (a)  real
Training Set	5species	10species	11species	12species	13species	14species	15species	16species
adult_circulatory.txt	629	74	36	15	8	3	2	1
adult_foregut.txt	647	55	29	14	8	4	1	0
adult_mesoderm.mapping1.txt	648	60	30	16	8	3	2	0
adult_midgut.txt	668	68	39	15	7	2	1	1
adult_muscle.txt	637	60	28	16	8	1	1	1
adult_pns.txt	908	70	39	21	12	7	3	1
adult_somatic_muscle.txt	692	50	33	22	13	5	3	2
amnioserosa.mapping1.txt	521	58	37	16	6	2	2	0
antennal_lobe.txt	646	72	30	19	10	4	1	1
blastoderm.mapping1.txt	668	76	43	21	12	7	3	1
cardiac.mapping1.txt	588	58	34	20	10	5	3	0
disc.mapping2.txt	771	88	55	23	12	4	0	0
emb-larval_opticlobe.txt	569	53	33	17	10	3	0	0
emb-larv_circulatory_system.txt	661	69	42	22	13	5	1	1
emb-larv_excretory.txt	643	70	45	20	4	1	0	0
emb-larv_fat_body.txt	872	95	48	26	14	5	1	0
emb-larv_foregut.txt	646	62	37	23	8	2	1	1
emb-larv_hindgut.txt	804	78	45	18	10	6	2	0
emb-larv_visceral.txt	666	53	29	16	6	4	1	1
embryonic_epidermis.txt	467	46	21	10	3	1	0	0
embryonic_midgut.txt	639	64	35	20	9	4	2	0
embryonic_muscle.txt	598	55	32	15	8	5	2	1
embryonic_salivary.txt	938	91	57	27	9	6	3	0
embryonic_sense_organ.txt	825	97	57	22	11	6	3	1
embryonic_somatic_muscle.txt	717	90	45	23	10	3	2	1
embryonic_trachea.txt	616	48	23	9	4	1	0	0
eye_disc.txt	732	70	33	15	7	3	2	1
eye.mapping1.txt	626	57	28	14	5	4	2	1
fat_body.mapping1.txt	829	81	43	18	6	5	2	0
female_reproductive.txt	853	96	53	30	14	4	2	0
haltere_disc.txt	610	71	46	30	14	5	3	1
leg_disc.txt	698	72	36	17	7	3	1	1
malpig.mapping1.txt	625	83	41	17	6	1	0	0
mapping1.dorsal_ectoderm.txt	400	39	19	8	3	3	2	1
mapping1.ectoderm.txt	460	54	35	15	2	1	0	0									1
mapping1.glia.txt	903	107	54	33	21	6	4	0
mapping1.salivary_gland.txt	647	92	48	22	9	4	3	0
mapping1.somatic_muscle.txt	465	52	34	15	9	3	1	1
mapping1.tracheal_system.txt	638	86	51	23	9	4	1	1
mapping1.ventral_ectoderm.txt	431	38	19	10	4	1	1	1
mapping1.visceral_mesoderm.txt	590	86	50	27	14	7	2	1
mapping2.ectoderm.txt	429	36	20	9	1	1	0	0
mapping2.glia.txt	769	83	51	32	13	8	3	0
mapping2.mesoderm.txt	463	50	31	17	9	5	1	1
mapping2.wing.txt	369	37	21	7	3	2	1	0
mesectoderm.mapping1.txt	583	56	30	15	4	3	3	1
mesoderm.mapping1.txt	1149	203	133	77	36	19	4	3
myoblast.txt	837	88	37	18	10	7	2	1
Max value	1149	203	133	77	36	19	4	3
Averge value	662.292	70.7708	39.4792	19.8958	9.14583	4.125	1.66667	0.604167
Minimum value	369	36	19	7	1	1	0	0

## Sheet: (b) 360 simulations
Training_set	Ortholog in 5 species	10 species	11 species	12 species	13 species	14 species	15 species	16 species	Training_set	Ortholog in 5 species	10 species	11 species	12 species	13 species	14 species	15 species	16 species	Training_set	Ortholog in 5 species	10 species	11 species	12 species	13 species	14 species	15 species	16 species	Training_set	Ortholog in 5 species	10 species	11 species	12 species	13 species	14 species	15 species	16 species	Training_set	Ortholog in 5 species	10 species	11 species	12 species	13 species	14 species	15 species	16 species	Training_set	Ortholog in 5 species	10 species	11 species	12 species
adult_circulatory.txt Real	629	74	36	15	8	3	2	1	adult_foregut.txt	647	55	29	14	8	4	1	0	adult_mesoderm.mapping1.txt	648	60	30	16	8	3	2	0	adult_midgut.txt	668	68	39	15	7	2	1	1	adult_muscle.txt	637	60	28	16	8	1	1	1	adult_pns.txt	908	70	39	21
adult_circulatory.txt Simulation # 1	576	44	18	8	3	3	1	1	adult_foregut.txt	568	45	20	7	4	1	1	0	adult_mesoderm.mapping1.txt	537	37	15	6	3	1	1	1	adult_midgut.txt	561	41	25	12	6	1	1	1	adult_muscle.txt	539	31	18	7	2	1	1	0	adult_pns.txt	734	85	41	21
Simulation # 2	544	47	22	8	4	2	1	0		561	36	25	11	7	3	0	0		540	39	15	5	5	3	1	0		585	40	22	11	6	4	2	1		519	33	20	10	7	2	1	0		768	71	43	18
Simulation # 3	591	39	26	12	5	3	1	1		571	35	17	10	5	2	0	0		550	37	16	5	1	1	0	0		580	29	20	11	6	1	1	1		561	40	16	8	4	2	0	0		728	77	35	20
Simulation # 4	566	42	15	7	4	1	1	1		555	46	18	9	4	1	1	1		535	34	15	10	5	1	1	0		563	45	23	14	6	3	1	0		547	46	21	8	5	3	1	1		754	75	37	15
Simulation # 5	561	45	22	14	5	2	2	0		583	39	17	8	6	2	1	0		547	32	14	8	6	3	2	2		565	51	22	9	5	3	0	0		521	31	17	12	3	1	1	1		745	74	40	18
Simulation # 6	571	44	21	10	4	2	2	0		558	41	19	6	3	2	2	1		537	35	15	10	7	4	0	0		546	39	16	9	7	3	2	0		526	45	22	11	4	2	1	1		755	84	45	23
Simulation # 7	577	43	18	5	3	2	1	1		557	36	17	9	6	1	1	0		523	30	18	9	4	2	1	1		560	37	15	8	2	2	1	0		533	42	23	11	5	4	2	0		737	64	32	18
Simulation # 8	570	32	14	9	3	2	1	1		547	49	20	9	4	2	1	0		547	32	13	6	3	3	1	1		567	41	25	15	4	3	1	0		544	34	17	8	2	2	2	1		743	79	36	17
Simulation # 9	568	47	23	7	4	2	1	1		577	32	18	6	2	1	1	1		531	30	10	6	3	3	2	0		571	37	20	10	7	3	1	0		546	33	20	7	5	2	2	1		764	82	41	27
Simulation # 10	559	36	20	8	4	2	1	1		561	46	24	11	6	2	1	0		552	32	13	5	3	1	1	0		581	42	23	11	6	2	1	1		540	42	18	8	3	2	1	0		747	72	35	15
Simulation # 11	560	45	17	11	6	2	1	1		560	41	16	11	6	1	1	1		549	39	23	12	7	2	2	0		573	49	26	13	5	2	1	0		543	36	22	9	4	1	1	1		734	86	45	21
Simulation # 12	569	45	23	11	4	1	1	1		533	38	21	10	5	3	2	0		518	37	23	13	6	4	1	1		566	40	22	12	5	3	2	1		510	42	21	9	4	2	1	1		762	67	32	16
Simulation # 13	567	45	21	8	5	1	0	0		566	36	16	10	7	4	1	1		554	36	15	7	4	3	1	0		568	45	21	9	5	1	1	0		523	36	22	11	6	1	1	1		744	75	44	17
Simulation # 14	558	35	20	13	4	3	2	1		551	45	22	9	4	1	1	1		551	44	17	10	5	1	1	0		574	35	15	6	3	3	1	0		530	43	17	10	5	4	2	1		790	73	41	18
Simulation # 15	567	46	23	10	6	1	1	1		564	32	19	8	4	3	2	0		569	43	21	8	4	1	0	0		559	44	23	12	5	3	2	0		551	33	14	5	4	1	1	1		775	72	36	17
Simulation # 16	576	45	19	7	3	2	2	1		560	38	17	7	2	2	1	1		533	40	18	7	1	1	1	1		566	36	19	11	5	2	1	0		520	40	19	12	5	2	1	0		770	78	41	19
Simulation # 17	551	43	21	12	3	3	1	0		546	40	20	10	5	4	1	1		540	41	22	10	4	3	1	0		582	50	20	10	4	4	3	0		510	38	19	7	5	1	1	0		765	84	46	19
Simulation # 18	577	44	23	11	6	3	2	1		544	42	18	11	4	2	1	1		535	29	15	9	5	4	2	0		570	39	17	8	4	2	2	0		545	40	16	8	4	3	1	0		738	73	37	19
Simulation # 19	557	42	24	9	1	1	1	1		556	38	22	9	7	3	2	1		553	36	19	9	4	2	1	0		557	35	16	10	4	4	3	1		528	36	21	9	7	2	1	1		753	78	47	21
Simulation # 20	550	36	22	10	6	2	1	0		542	45	20	8	3	3	2	1		535	41	22	11	6	4	1	1		569	43	19	13	4	3	1	1		525	45	21	12	3	1	1	0		761	75	37	20
Simulation # 21	563	37	24	7	2	2	2	2		563	35	11	6	3	2	1	1		526	49	21	10	3	2	1	0		580	38	17	7	5	3	1	0		534	39	18	8	5	2	1	1		772	80	36	10
Simulation # 22	554	46	22	10	6	3	1	1		588	33	14	5	4	4	0	0		538	45	23	11	5	1	1	0		564	37	21	13	7	5	1	0		538	26	15	8	5	2	1	1		746	70	38	16
Simulation # 23	560	35	19	11	5	2	1	1		534	42	24	15	5	2	1	0		537	37	15	6	4	2	1	1		596	41	13	6	4	1	0	0		544	38	19	9	3	2	1	1		746	70	41	17
Simulation # 24	564	40	13	7	3	2	1	1		549	37	17	8	3	1	1	1		526	40	16	9	4	3	1	0		591	50	23	11	5	2	1	1		515	39	20	7	5	3	1	1		747	78	40	21
Simulation # 25	572	50	24	12	6	2	1	0		551	39	16	10	4	1	1	0		524	41	20	10	6	4	1	1		572	39	21	7	3	3	1	0		531	41	21	12	3	2	1	1		761	71	39	18
Simulation # 26	563	50	25	14	4	2	1	1		566	43	17	7	2	1	1	1		525	37	21	8	5	3	1	1		547	51	22	7	3	2	1	1		544	38	25	12	8	4	1	0		749	74	38	15
Simulation # 27	555	49	23	11	1	1	1	1		564	42	20	8	4	1	1	1		557	41	20	12	7	3	1	1		546	43	16	8	4	1	1	1		568	30	16	10	5	2	1	1		742	84	44	18
Simulation # 28	563	43	24	4	3	2	2	1		552	31	18	8	4	2	2	1		541	44	20	11	4	3	2	0		584	47	19	9	4	2	2	1		514	41	18	8	3	2	1	0		747	75	34	16
Simulation # 29	551	43	19	9	5	3	1	1		551	43	21	11	5	2	2	1		553	37	19	9	4	3	1	0		569	44	28	11	6	3	1	0		554	39	20	7	2	1	1	0		745	72	32	17
Simulation # 30	582	36	20	11	5	3	1	0		573	43	20	10	6	3	2	0		532	45	21	8	5	2	1	1		580	34	14	8	5	3	1	0		563	36	18	7	3	1	1	0		736	68	39	24
Simulation # 31	576	42	21	13	8	3	2	1		562	44	19	8	5	2	2	1		539	30	16	5	3	2	0	0		575	49	20	9	6	2	1	0		532	46	23	11	3	1	0	0		752	72	32	17
Simulation # 32	578	45	23	8	4	2	0	0		553	44	23	13	5	2	1	0		567	41	18	7	4	2	1	0		568	44	22	9	4	2	1	0		535	45	23	9	5	2	2	0		783	76	42	19
Simulation # 33	572	36	13	10	7	2	1	1		564	44	17	10	6	1	1	1		553	37	14	7	4	2	1	0		571	39	15	8	1	1	1	0		552	35	20	8	4	3	2	1		747	68	36	18
Simulation # 34	560	48	23	12	3	2	1	0		531	40	23	13	4	1	1	0		555	40	19	10	6	1	1	1		566	42	23	4	4	1	1	0		529	38	16	8	6	2	1	1		744	71	41	17
Simulation # 35	578	37	24	10	5	1	1	1		552	42	20	11	9	4	2	0		512	44	23	10	5	3	3	0		569	36	13	10	5	3	0	0		526	40	17	7	5	3	1	0		744	69	42	14
Simulation # 36	574	44	18	6	5	3	0	0		551	42	15	6	5	3	1	0		543	34	18	8	5	3	1	1		567	46	21	7	4	3	0	0		517	36	14	8	3	2	2	1		737	72	41	23
Simulation # 37	551	41	21	10	3	1	1	1		552	37	19	11	5	3	2	0		555	42	19	10	4	1	1	0		558	41	20	12	4	1	1	1		551	34	17	8	4	2	1	1		728	73	46	18
Simulation # 38	534	47	20	9	4	4	2	1		535	48	33	16	7	3	2	0		555	42	19	11	5	2	1	1		555	42	16	12	4	2	2	2		533	34	20	13	5	1	1	0		772	59	29	16
Simulation # 39	554	46	17	10	4	3	2	1		567	34	21	13	6	1	1	1		565	43	21	11	6	1	1	1		555	42	21	9	4	1	1	1		550	32	17	6	2	1	1	1		743	71	36	21
Simulation # 40	566	47	19	11	4	3	1	1		567	38	19	13	4	1	1	0		523	43	16	12	8	3	2	1		558	43	20	12	6	2	1	1		532	49	24	9	5	3	3	1		748	70	38	22
Simulation # 41	539	35	16	10	6	2	1	1		577	47	30	14	6	2	0	0		543	38	18	7	5	3	1	0		596	45	22	13	4	2	1	1		527	37	16	10	4	2	1	1		735	83	39	21
Simulation # 42	585	36	18	6	3	1	1	1		558	40	24	10	2	1	0	0		542	42	21	10	4	2	1	1		552	50	26	13	6	3	2	1		559	42	27	9	7	6	2	0		731	69	32	15
Simulation # 43	585	40	21	8	3	1	1	0		562	40	25	9	5	2	1	1		526	43	17	7	3	2	1	1		558	41	24	8	3	1	1	0		543	40	20	9	6	3	2	1		752	70	39	15
Simulation # 44	565	39	18	8	3	2	1	0		559	38	22	10	5	1	1	1		573	35	17	13	8	4	1	1		572	50	23	11	4	1	1	1		527	36	21	13	6	1	1	1		755	81	38	20
Simulation # 45	571	45	22	10	8	3	0	0		566	37	15	7	6	1	1	1		575	48	19	7	3	3	1	1		564	34	16	9	4	4	2	1		528	37	19	9	3	2	1	1		743	78	37	18
Simulation # 46	578	38	16	9	4	3	2	2		571	42	21	9	4	2	2	2		538	32	18	9	5	3	1	0		564	43	20	10	6	3	2	2		536	38	21	11	4	1	0	0		773	76	36	17
Simulation # 47	557	42	20	10	5	1	1	1		571	37	15	5	4	2	1	1		549	41	21	10	3	2	1	0		553	51	25	9	5	1	1	1		537	41	21	8	5	3	1	1		763	76	32	19
Simulation # 48	588	37	18	7	4	3	2	2		576	37	22	12	4	3	1	1		531	35	19	10	5	2	1	1		590	42	22	9	5	4	2	1		551	33	15	7	3	2	2	0		787	77	33	21
Simulation # 49	578	39	21	10	4	1	1	1		576	38	19	10	5	3	2	1		548	32	16	8	4	3	1	1		554	33	19	12	6	3	1	0		544	35	21	7	3	2	2	0		737	80	40	27
Simulation # 50	560	50	29	16	4	3	1	0		562	39	20	7	3	3	2	1		545	40	21	13	8	3	1	1		592	44	21	10	3	3	2	0		532	43	22	7	2	1	1	1		756	76	40	16
Simulation # 51	561	37	16	8	3	2	1	0		569	36	16	10	3	1	0	0		573	42	16	4	3	2	1	0		569	54	27	13	7	3	2	2		538	44	15	9	3	1	0	0		777	87	47	23
Simulation # 52	592	36	19	10	5	2	2	0		562	32	16	8	3	1	1	0		517	45	20	9	6	5	2	0		572	40	26	10	7	2	1	0		517	36	22	8	4	2	1	1		734	70	37	17
Simulation # 53	553	42	20	9	4	3	1	0		571	33	16	7	2	1	0	0		524	37	19	6	4	1	1	1		532	47	21	12	5	2	2	1		554	41	23	11	4	2	1	1		759	70	34	15
Simulation # 54	569	38	15	10	7	2	0	0		557	41	20	8	4	3	2	1		529	41	22	10	4	2	2	1		568	49	24	12	4	2	1	1		540	43	20	12	3	3	1	1		744	77	40	18
Simulation # 55	567	36	17	9	3	2	0	0		559	46	18	10	4	1	1	1		549	32	15	8	4	2	2	1		569	50	26	14	5	2	1	1		522	35	19	9	6	2	1	1		748	69	30	11
Simulation # 56	570	39	19	8	3	1	1	1		572	38	17	9	7	2	1	1		514	46	23	11	6	4	3	1		587	40	16	10	8	1	1	1		553	36	14	8	7	3	2	0		770	69	27	16
Simulation # 57	553	38	18	9	7	4	1	0		559	43	21	12	6	3	1	0		530	37	17	11	6	1	1	0		561	45	23	11	5	1	1	0		543	36	21	11	4	2	1	0		749	79	39	23
Simulation # 58	547	55	27	12	4	2	1	0		563	41	21	12	6	3	1	1		547	43	18	8	4	2	2	0		568	42	22	9	4	1	1	1		528	38	18	12	6	4	2	1		778	71	36	20
Simulation # 59	550	47	29	16	6	4	2	0		566	38	22	14	8	4	1	0		527	33	17	11	5	3	1	1		579	36	16	7	3	2	1	0		545	30	15	8	5	1	1	1		745	74	40	16
Simulation # 60	558	35	17	7	3	2	1	0		549	36	16	7	4	3	1	0		539	48	19	10	4	1	1	1		557	43	17	7	4	3	0	0		514	39	16	7	4	2	1	1		754	76	35	23
Simulation # 61	567	34	15	7	5	3	0	0		541	48	15	10	8	3	1	0		529	48	23	9	3	2	2	1		545	36	13	8	4	3	2	0		539	37	17	9	6	3	1	1		764	61	31	15
Simulation # 62	555	33	14	9	7	4	1	1		572	41	21	11	4	2	0	0		538	38	17	8	6	2	1	1		565	44	21	10	5	2	1	1		531	46	16	7	6	2	2	2		757	75	38	14
Simulation # 63	567	48	30	13	3	2	2	0		564	45	23	13	4	2	1	1		539	34	17	8	4	2	1	0		576	44	26	14	8	2	1	0		527	36	19	12	5	3	1	1		755	80	46	17
Simulation # 64	557	36	18	10	1	1	1	0		573	42	16	9	5	3	1	1		550	45	22	9	7	2	1	0		570	45	20	8	2	1	0	0		554	37	19	9	3	3	1	1		761	75	37	15
Simulation # 65	551	49	23	11	4	2	2	1		554	46	20	10	4	2	1	0		553	35	18	8	5	4	2	0		579	40	16	8	6	3	1	0		551	27	15	8	5	3	2	1		755	61	32	22
Simulation # 66	561	45	21	7	4	3	1	1		556	45	21	10	5	2	2	1		540	41	17	9	3	1	1	1		575	39	18	11	4	3	2	1		527	37	18	8	4	1	1	1		749	85	43	16
Simulation # 67	566	36	18	12	5	3	1	1		563	49	26	13	6	1	1	1		513	36	17	6	3	0	0	0		578	43	20	8	7	4	1	0		534	38	18	7	3	1	1	1		763	71	36	19
Simulation # 68	575	38	18	8	1	1	1	0		544	32	13	8	3	2	1	1		545	40	17	11	8	3	2	1		573	40	18	10	5	4	3	0		545	34	17	10	6	4	1	0		766	69	37	13
Simulation # 69	569	39	21	11	7	2	2	0		580	38	17	6	3	3	3	1		556	34	20	8	2	1	1	1		576	41	23	10	6	1	1	0		531	42	14	8	4	1	1	1		750	67	32	19
Simulation # 70	552	44	20	9	3	2	1	0		549	28	13	7	3	2	2	0		542	39	17	5	3	1	1	0		574	39	19	12	6	4	2	1		512	48	22	11	5	3	1	1		754	73	42	25
Simulation # 71	556	31	16	9	3	1	1	1		557	32	16	8	2	1	1	1		550	33	19	6	4	1	1	1		595	47	20	8	4	1	1	0		533	36	18	9	4	3	2	1		746	75	37	19
Simulation # 72	591	43	20	11	3	2	1	1		562	31	12	4	2	2	1	1		539	29	15	8	6	4	2	0		559	41	24	14	5	2	1	1		536	45	21	9	4	3	1	1		757	71	37	18
Simulation # 73	570	43	23	7	5	2	1	1		594	40	20	7	3	1	1	0		536	35	15	6	3	1	1	1		567	39	18	8	4	2	1	0		512	31	18	7	4	1	1	1		756	80	38	20
Simulation # 74	552	35	17	8	2	2	1	1		540	39	15	8	5	2	1	1		562	36	16	6	4	3	1	0		575	45	21	10	4	1	1	1		571	38	20	7	3	2	2	1		756	83	48	16
Simulation # 75	546	38	17	14	7	3	1	0		548	35	15	9	6	4	2	1		529	39	15	7	3	2	1	0		597	41	18	10	4	3	1	1		534	31	17	10	5	2	1	1		765	71	34	13
Simulation # 76	560	34	19	8	4	2	1	1		556	40	21	6	3	1	1	0		513	35	23	11	3	1	1	0		591	47	23	14	7	3	2	1		524	37	19	12	6	5	1	1		766	68	30	14
Simulation # 77	554	32	14	6	2	1	1	0		560	42	16	10	4	2	2	1		539	28	15	9	2	2	1	0		558	39	19	12	6	3	2	1		558	37	12	6	4	3	3	1		753	76	36	19
Simulation # 78	577	45	19	11	4	1	1	1		545	47	24	10	4	2	2	2		569	36	18	5	2	1	1	0		567	37	21	8	3	2	2	2		530	39	24	13	8	4	2	1		703	72	39	18
Simulation # 79	546	32	14	7	5	3	2	1		575	45	16	12	6	2	1	1		549	37	15	7	3	2	1	0		557	46	19	9	3	1	1	1		548	43	25	11	3	1	1	1		732	74	37	20
Simulation # 80	576	46	26	12	5	1	1	0		551	33	19	9	4	2	1	1		526	46	23	8	3	1	1	1		554	35	17	8	5	4	2	2		558	43	25	10	5	3	2	0		721	75	40	21
Simulation # 81	573	32	17	9	3	2	2	0		563	46	18	10	4	2	1	0		541	45	15	6	4	4	1	0		576	40	23	13	8	5	2	2		536	28	15	9	3	2	1	0		775	87	40	17
Simulation # 82	567	43	23	10	3	1	1	1		562	40	20	12	5	1	1	0		559	38	20	6	3	3	2	1		579	42	25	10	4	2	2	2		547	32	15	5	3	1	1	1		754	71	38	18
Simulation # 83	560	41	21	13	4	2	0	0		555	41	20	10	9	3	1	0		550	35	15	7	4	2	0	0		584	43	14	9	5	1	1	1		560	37	19	9	6	2	2	1		763	70	36	17
Simulation # 84	561	50	25	10	7	3	1	1		584	35	17	12	7	2	1	1		540	40	18	7	3	2	1	1		571	44	22	8	6	2	1	0		528	38	18	5	3	1	1	1		762	76	37	21
Simulation # 85	549	37	21	9	4	2	1	0		559	36	18	6	3	3	2	0		544	34	14	6	4	2	2	0		568	51	25	13	5	3	2	0		542	28	12	8	4	2	1	1		744	63	43	23
Simulation # 86	557	37	18	7	4	4	3	0		575	39	19	8	3	1	1	1		534	35	15	6	4	1	1	0		558	52	24	10	2	2	2	1		558	45	20	10	5	1	1	0		743	84	36	12
Simulation # 87	572	38	19	12	6	3	1	1		529	43	21	11	5	3	1	0		545	45	17	5	2	2	2	0		556	42	21	11	3	2	1	0		532	34	14	7	4	4	2	1		755	69	36	14
Simulation # 88	546	46	20	12	6	2	1	0		544	34	22	15	7	1	1	1		547	36	18	6	2	1	1	0		581	37	22	9	7	5	2	0		533	36	15	6	3	1	1	0		750	71	38	19
Simulation # 89	545	43	25	13	5	4	1	1		544	45	18	8	8	6	3	0		521	37	21	8	3	1	1	0		566	41	17	10	4	1	1	0		544	36	22	12	4	2	2	1		740	79	48	20
Simulation # 90	582	46	27	11	6	3	2	1		544	42	21	11	8	3	1	1		563	42	18	7	3	2	1	0		561	40	20	8	4	2	1	0		543	31	15	10	6	5	1	1		740	82	41	27
Simulation # 91	577	34	21	9	4	3	1	1		555	46	19	7	5	2	1	0		546	34	23	7	2	2	1	1		564	46	23	6	4	1	1	1		549	36	23	11	4	1	0	0		747	68	34	17
Simulation # 92	578	40	17	9	3	2	1	1		545	41	20	10	3	2	1	1		511	39	20	10	4	2	2	1		594	40	25	9	6	1	1	1		542	42	22	10	3	2	1	1		761	80	42	22
Simulation # 93	569	36	17	6	1	1	1	1		540	49	20	7	5	2	1	0		557	31	16	8	4	2	1	0		581	40	25	7	4	2	2	2		549	31	13	6	3	1	1	1		772	68	36	22
Simulation # 94	579	38	18	11	5	3	3	2		558	42	22	10	2	1	1	0		535	46	18	13	4	1	1	0		578	38	24	10	5	3	3	1		514	31	14	7	5	4	4	2		732	71	43	19
Simulation # 95	573	35	17	8	4	2	1	0		547	31	15	9	5	3	1	1		568	38	20	6	4	2	1	1		590	45	21	11	5	3	1	1		529	30	15	7	4	3	2	1		757	72	39	19
Simulation # 96	569	46	24	12	4	2	0	0		556	49	26	7	3	2	2	1		533	39	19	8	3	2	1	0		559	48	25	12	6	1	1	1		533	38	21	14	4	3	2	0		736	77	41	22
Simulation # 97	565	43	23	9	2	1	1	1		567	38	16	9	4	1	1	1		520	42	18	7	5	3	2	0		566	47	25	13	3	2	1	1		536	41	21	11	5	2	1	0		771	75	37	18
Simulation # 98	581	40	20	7	5	3	2	0		555	43	23	7	5	4	3	1		533	40	18	11	3	2	1	1		607	37	19	9	5	3	0	0		532	44	22	10	7	3	2	1		762	86	40	17
Simulation # 99	590	47	24	11	6	3	1	1		558	40	23	16	5	2	0	0		532	38	15	9	4	1	1	0		568	45	19	14	6	2	2	1		532	32	11	7	4	2	1	1		762	65	33	17
Simulation # 100	560	40	19	10	7	4	3	2		565	49	19	8	6	2	1	0		532	37	19	9	5	1	1	0		560	43	23	15	5	4	2	1		537	38	20	10	5	3	2	0		765	77	41	18
Simulation # 101	557	32	21	9	4	2	1	0		589	38	19	10	3	2	2	0		550	45	20	10	7	3	2	0		559	44	16	9	4	2	1	1		526	38	19	9	4	2	2	0		757	73	33	16
Simulation # 102	578	39	18	8	6	3	2	0		543	38	19	9	4	2	2	1		537	40	19	11	3	1	1	1		599	41	19	9	6	2	1	0		531	43	18	6	4	1	1	1		766	78	39	23
Simulation # 103	579	39	20	11	5	2	1	1		574	39	19	10	4	2	1	1		540	37	21	11	4	3	1	0		571	41	23	10	7	3	2	1		543	36	16	6	2	1	1	0		766	73	40	21
Simulation # 104	571	50	23	10	4	1	0	0		554	39	24	9	3	3	1	0		567	44	20	10	7	2	1	1		548	37	23	6	5	2	1	0		531	32	15	7	2	1	1	0		750	68	36	16
Simulation # 105	575	39	15	9	6	2	1	0		555	42	19	11	5	2	2	0		540	31	16	8	5	1	1	1		561	44	27	12	7	4	1	0		541	39	21	10	7	3	2	1		754	70	39	21
Simulation # 106	576	36	20	11	5	3	1	1		555	35	19	6	4	1	1	0		515	39	21	10	3	2	1	1		568	41	21	10	3	2	1	0		530	27	15	7	3	2	1	1		771	72	33	19
Simulation # 107	559	37	16	4	3	2	2	0		553	45	18	7	5	2	1	1		541	30	17	5	3	2	1	1		600	44	21	5	3	2	1	0		542	36	16	8	5	2	1	0		745	88	48	17
Simulation # 108	554	48	25	10	6	1	1	1		553	45	24	9	3	2	2	1		538	37	18	11	5	3	2	0		571	48	21	10	5	2	0	0		542	38	21	10	6	2	1	1		794	79	41	19
Simulation # 109	556	46	24	9	5	2	0	0		552	40	18	7	5	4	2	1		541	32	13	10	3	1	1	1		577	44	20	7	3	2	1	1		549	33	12	7	4	1	1	1		757	76	36	18
Simulation # 110	553	51	21	11	4	2	1	1		568	41	20	11	7	3	2	0		514	36	15	8	4	2	1	0		585	46	21	8	4	1	1	0		523	39	18	8	6	3	2	0		775	66	36	23
Simulation # 111	581	39	23	9	6	2	2	1		560	45	22	10	7	2	1	1		543	34	16	9	5	1	1	1		550	44	18	7	3	1	1	1		540	40	17	8	1	1	1	1		747	65	31	13
Simulation # 112	543	39	16	7	3	2	2	1		550	31	18	6	4	1	1	0		537	43	19	8	3	1	1	1		581	45	21	11	5	3	3	0		529	42	19	10	8	5	2	1		746	71	41	23
Simulation # 113	556	36	15	9	6	1	1	0		549	42	18	9	5	2	1	1		548	41	20	5	5	1	1	0		563	45	16	11	7	3	2	1		535	42	17	7	4	1	1	1		744	76	42	23
Simulation # 114	531	47	21	8	3	1	1	0		540	51	26	10	7	3	1	1		552	41	25	11	6	3	2	1		611	41	16	10	5	3	2	2		521	44	17	9	4	1	1	1		761	73	38	18
Simulation # 115	567	40	17	7	5	5	2	1		565	38	23	12	5	2	1	1		555	31	16	12	5	1	1	0		569	43	24	14	7	1	1	1		534	32	16	7	4	3	1	1		753	81	44	17
Simulation # 116	573	41	16	9	7	4	2	1		559	45	24	12	7	3	2	1		532	38	13	6	3	1	1	0		570	44	21	9	3	2	1	0		530	32	18	9	4	1	1	1		760	69	37	22
Simulation # 117	563	42	20	8	5	2	1	0		546	36	20	10	4	1	1	1		559	38	21	13	3	1	1	1		596	44	21	8	4	2	1	1		524	36	18	7	4	2	1	1		759	68	36	14
Simulation # 118	547	50	23	11	6	2	1	0		579	42	17	8	4	2	1	0		515	30	17	10	5	2	1	0		582	38	21	5	3	3	1	0		508	40	20	10	5	1	1	0		730	84	42	20
Simulation # 119	551	38	22	13	7	3	1	0		562	44	21	9	5	3	1	1		575	45	20	9	6	2	1	0		571	45	23	8	5	3	1	1		539	35	17	9	5	4	1	1		740	77	34	15
Simulation # 120	569	28	15	11	4	3	1	1		551	38	16	6	3	2	1	1		518	28	15	9	5	2	1	1		579	33	20	7	2	2	2	1		547	29	12	6	4	1	1	1		784	74	37	20
Simulation # 121	575	39	18	5	3	2	2	1		574	41	24	12	5	3	1	1		567	39	21	9	4	2	1	1		561	33	18	9	6	5	4	2		536	32	15	6	3	2	1	1		753	75	34	14
Simulation # 122	560	28	16	12	7	3	2	1		566	33	17	10	7	2	1	0		536	32	16	8	5	2	1	0		585	34	22	10	2	2	2	1		542	38	19	6	2	2	1	1		760	83	41	22
Simulation # 123	555	39	23	13	5	2	1	0		568	41	24	10	3	3	1	0		569	29	15	9	3	1	1	0		592	43	22	9	3	3	1	0		552	41	17	5	2	2	1	0		738	78	38	15
Simulation # 124	564	43	17	8	5	2	1	1		588	39	22	6	4	2	1	0		564	39	16	9	6	5	2	1		555	38	18	8	3	2	2	1		547	34	15	9	7	3	2	1		733	77	38	18
Simulation # 125	574	48	19	7	3	1	1	1		550	41	21	9	7	4	1	0		573	50	22	9	5	3	2	1		597	53	23	13	4	2	1	1		535	36	14	9	3	3	1	0		782	80	50	22
Simulation # 126	574	44	19	8	2	1	1	1		553	54	21	10	6	3	1	1		517	38	19	10	3	1	1	1		558	40	21	11	4	1	1	1		537	36	19	8	4	2	1	0		776	79	32	14
Simulation # 127	602	40	19	7	4	3	2	1		556	40	17	5	3	2	2	1		542	44	20	10	4	2	1	1		570	39	17	13	6	3	1	0		561	37	17	5	3	3	1	1		765	72	35	12
Simulation # 128	559	47	17	10	6	4	2	0		561	40	15	9	4	1	0	0		523	33	15	10	8	1	1	0		564	46	21	10	6	3	1	0		523	44	15	7	3	2	1	0		782	74	38	20
Simulation # 129	560	42	22	10	4	2	2	1		581	47	26	12	5	2	1	0		547	33	22	9	4	3	1	1		569	49	26	12	6	2	1	1		542	33	16	9	7	3	2	1		762	80	41	19
Simulation # 130	568	38	21	8	5	3	1	1		567	41	18	5	3	1	1	1		554	39	19	11	8	3	2	2		589	35	15	7	1	1	0	0		562	39	21	8	4	1	1	1		748	68	36	16
Simulation # 131	560	39	20	13	6	4	1	0		540	40	16	8	3	1	1	0		550	35	22	9	4	3	2	0		563	42	23	10	5	2	1	0		526	34	17	11	5	2	2	1		770	70	33	20
Simulation # 132	563	53	23	13	11	5	2	1		546	46	21	11	5	2	2	0		554	45	17	8	4	2	1	1		562	44	19	12	8	4	2	2		554	29	17	10	2	2	1	1		770	66	30	16
Simulation # 133	585	39	17	12	6	2	1	0		562	54	26	10	6	3	2	1		526	32	18	8	5	2	0	0		584	42	22	11	7	2	2	1		548	40	18	9	5	3	1	0		773	74	39	17
Simulation # 134	563	37	17	8	5	3	2	0		539	36	22	13	7	2	1	1		540	41	20	6	4	2	1	1		584	40	17	7	3	2	2	1		544	39	18	7	3	3	1	0		744	70	31	21
Simulation # 135	579	43	19	9	6	4	1	1		562	47	18	8	5	2	1	1		557	40	17	9	3	1	1	1		592	49	19	10	4	3	1	1		550	34	20	12	3	1	0	0		765	77	42	20
Simulation # 136	573	48	27	13	7	4	2	1		573	29	13	7	1	1	1	1		523	34	17	7	3	3	1	0		592	35	18	9	6	2	2	0		535	39	14	8	4	2	1	0		760	84	40	14
Simulation # 137	565	37	17	11	4	2	1	1		553	41	25	10	5	2	1	0		550	38	20	6	4	1	1	1		560	41	21	11	5	2	1	1		505	30	19	12	5	1	1	1		734	83	34	19
Simulation # 138	587	37	17	10	7	4	3	2		551	36	12	7	4	2	0	0		531	39	22	13	4	3	1	0		547	37	15	8	2	1	1	1		538	46	23	11	5	2	1	1		749	70	36	17
Simulation # 139	563	49	23	11	5	2	1	0		576	41	20	11	4	3	1	1		518	36	14	7	2	1	1	0		567	45	22	11	5	4	1	0		552	39	19	8	5	1	1	0		747	77	37	19
Simulation # 140	549	36	17	11	6	3	1	1		571	42	19	8	3	2	1	1		538	37	17	8	3	2	1	1		545	46	19	7	5	2	1	1		539	30	14	9	2	1	1	1		758	67	40	18
Simulation # 141	547	44	28	10	6	2	1	1		538	42	21	9	4	3	1	0		529	35	17	8	6	1	1	0		553	50	25	13	5	3	1	1		511	47	21	10	5	3	2	1		761	82	40	24
Simulation # 142	581	46	17	10	4	3	2	0		556	37	23	13	6	1	1	1		550	42	20	10	4	2	1	0		585	41	18	9	2	2	1	1		557	36	20	11	7	5	3	1		767	79	35	21
Simulation # 143	541	49	23	10	3	2	1	1		561	34	13	6	4	3	1	0		537	41	24	10	2	2	1	0		567	37	21	10	5	2	1	1		550	33	20	6	4	2	1	0		740	82	43	21
Simulation # 144	571	28	14	6	2	1	1	1		548	38	19	11	1	1	1	1		563	34	14	9	4	2	1	1		584	45	20	11	5	3	1	1		550	38	18	7	5	2	1	1		735	84	45	17
Simulation # 145	572	40	22	10	5	3	2	1		569	36	18	11	7	3	1	1		523	37	19	11	5	3	2	0		589	41	21	9	3	1	1	0		547	39	19	14	6	2	1	0		735	77	36	14
Simulation # 146	531	39	23	10	5	2	1	1		542	44	21	9	3	1	1	1		549	33	15	10	5	3	1	0		598	44	21	10	3	2	2	0		550	27	15	10	5	2	2	1		754	86	49	25
Simulation # 147	566	39	19	7	6	4	1	0		563	31	21	10	4	3	2	0		527	40	25	7	1	1	1	0		574	47	26	12	3	1	1	1		558	41	16	6	2	1	1	1		739	74	42	17
Simulation # 148	578	42	20	10	4	3	1	1		568	40	19	7	4	1	0	0		569	33	18	8	4	2	1	1		555	37	18	12	7	2	0	0		514	44	21	10	5	2	1	0		773	83	42	17
Simulation # 149	549	47	18	8	4	2	1	0		575	41	24	17	10	4	1	1		519	44	21	10	6	3	1	1		576	42	24	9	5	3	1	1		541	30	15	9	3	2	1	1		745	76	44	25
Simulation # 150	568	38	15	9	4	2	1	1		561	41	19	11	5	2	1	1		545	41	17	8	4	2	2	0		592	46	24	10	4	2	1	1		522	32	20	9	6	3	2	2		778	79	45	23
Simulation # 151	551	40	19	8	5	3	2	2		582	41	17	10	3	3	0	0		551	43	21	7	2	1	1	0		555	50	24	11	7	3	2	0		551	31	16	6	4	3	1	1		758	70	41	27
Simulation # 152	570	38	18	8	4	3	2	0		570	43	21	10	4	1	1	1		541	42	25	9	3	1	1	1		549	34	24	13	4	2	1	0		561	42	21	10	6	2	1	0		738	72	33	13
Simulation # 153	578	36	17	10	3	2	2	1		577	39	17	9	5	2	1	1		554	31	12	6	4	2	1	0		584	45	23	13	5	5	2	1		540	27	15	7	5	4	2	0		772	84	42	15
Simulation # 154	558	49	30	14	6	3	2	1		567	38	19	15	6	2	0	0		564	42	21	7	4	1	1	1		550	38	23	10	7	2	1	1		542	43	21	9	2	1	1	1		738	73	34	17
Simulation # 155	523	45	25	8	4	4	1	0		592	42	22	8	4	3	2	0		568	40	18	9	4	2	1	0		570	39	18	9	4	2	1	0		548	32	19	9	3	3	1	1		738	81	42	18
Simulation # 156	561	45	19	10	5	3	1	1		553	45	26	13	4	2	1	0		553	36	23	11	8	3	0	0		606	51	24	10	4	1	1	1		520	38	19	7	3	3	1	1		759	75	38	19
Simulation # 157	554	39	17	10	5	3	2	0		577	41	22	9	5	1	1	1		559	40	20	9	5	3	1	0		570	40	24	11	6	2	1	1		531	33	16	8	6	3	2	1		739	76	38	22
Simulation # 158	552	48	20	8	6	1	1	1		564	37	19	10	5	3	2	0		545	43	16	6	2	1	1	1		576	47	28	12	6	2	1	1		546	42	20	6	4	1	1	1		771	63	32	11
Simulation # 159	555	41	21	13	7	2	1	0		554	40	20	9	4	2	1	1		542	47	18	11	7	2	1	0		572	36	23	9	4	1	1	1		525	40	18	11	7	3	1	1		756	78	35	14
Simulation # 160	556	50	22	8	5	3	1	1		577	39	20	11	7	4	2	0		550	36	23	10	2	1	1	1		561	42	23	11	6	4	1	1		544	37	19	10	7	1	1	1		758	71	43	21
Simulation # 161	566	46	24	10	4	3	2	1		580	40	13	4	2	1	0	0		539	43	24	9	6	4	2	0		576	46	20	10	4	2	1	1		536	31	14	12	6	3	1	0		763	73	35	19
Simulation # 162	565	44	20	11	6	1	1	1		553	36	13	7	5	3	2	0		519	39	21	12	7	3	1	0		564	39	17	9	4	2	2	1		524	37	23	11	8	3	2	1		738	70	40	22
Simulation # 163	560	37	20	10	5	1	1	1		568	37	21	9	6	4	2	0		557	33	14	4	2	1	1	0		575	34	18	10	6	3	1	0		499	35	20	9	4	1	1	1		750	72	40	23
Simulation # 164	541	36	15	7	2	2	1	0		543	43	20	9	4	2	1	1		535	33	14	6	4	2	1	0		593	45	23	11	5	3	1	0		535	36	16	10	6	4	1	0		769	77	41	20
Simulation # 165	554	47	21	9	6	4	1	0		553	43	26	13	6	3	1	0		537	38	18	8	5	4	1	0		570	42	25	7	3	2	1	0		558	33	18	12	3	2	1	0		733	77	39	19
Simulation # 166	565	34	17	9	4	2	2	1		573	39	22	10	4	2	1	0		551	41	21	10	2	2	0	0		555	40	20	9	4	3	2	1		538	41	22	7	3	2	2	1		758	71	33	17
Simulation # 167	566	40	20	10	5	2	1	1		559	44	19	10	5	2	2	1		541	36	15	8	2	1	1	0		592	40	25	7	4	2	1	1		543	40	20	11	4	2	1	0		757	65	35	23
Simulation # 168	574	38	21	9	4	2	2	1		542	41	22	10	5	3	1	0		530	41	14	10	3	1	1	1		596	46	22	11	4	3	1	0		564	40	18	9	5	3	1	1		768	64	30	15
Simulation # 169	573	45	22	14	6	1	1	0		547	37	20	11	5	2	1	0		541	44	24	12	2	2	1	1		553	40	15	10	5	5	2	1		559	31	19	9	6	3	1	1		749	81	43	20
Simulation # 170	585	38	18	9	7	4	2	1		544	42	21	8	4	2	1	1		554	41	17	8	5	2	2	1		585	37	18	6	3	2	1	1		524	36	16	8	3	1	1	1		752	70	44	21
Simulation # 171	553	52	22	11	4	1	1	1		557	40	23	13	7	1	1	0		538	36	17	6	2	1	1	0		568	37	16	6	2	2	1	0		523	41	19	15	4	1	1	0		742	70	32	17
Simulation # 172	586	38	24	11	7	5	2	1		553	33	16	7	1	1	1	0		560	35	15	7	5	3	1	0		581	36	20	11	6	4	3	1		554	36	17	8	4	2	2	1		742	82	39	20
Simulation # 173	580	40	22	6	5	3	1	1		583	47	18	6	3	1	1	0		554	44	22	9	3	2	1	0		571	42	18	12	6	3	1	1		530	37	17	11	5	5	1	1		748	78	40	15
Simulation # 174	554	43	19	10	5	3	2	2		573	34	17	11	3	2	1	1		559	31	18	7	4	4	1	0		558	48	21	9	4	1	1	1		529	42	18	12	9	4	1	1		757	67	36	17
Simulation # 175	554	45	26	10	8	2	1	1		549	45	20	12	8	3	2	0		558	39	17	8	3	2	0	0		553	50	30	13	7	3	1	1		538	43	19	10	6	2	1	1		727	76	37	23
Simulation # 176	556	33	19	8	4	2	1	1		555	39	19	9	5	5	1	0		550	40	19	5	3	1	1	1		543	42	17	11	5	2	2	0		567	35	14	4	2	1	1	1		734	72	34	17
Simulation # 177	556	43	18	8	3	1	1	0		545	42	12	6	3	1	1	1		528	43	24	9	4	2	1	0		566	51	22	8	5	3	1	0		543	36	18	9	6	4	2	1		721	67	34	19
Simulation # 178	555	45	20	10	2	1	1	0		569	50	23	13	7	2	1	1		531	46	20	12	4	2	1	0		606	48	20	12	4	3	1	0		556	37	22	8	5	3	2	2		760	69	27	11
Simulation # 179	543	31	16	7	5	2	1	0		537	39	16	8	4	3	1	1		536	33	15	9	3	1	1	1		576	43	18	7	3	1	1	1		537	39	21	11	5	2	0	0		751	97	60	29
Simulation # 180	563	46	22	11	7	5	3	0		524	32	14	5	3	2	1	1		524	38	25	11	4	2	1	1		572	44	19	9	4	3	2	0		530	37	20	8	5	3	1	1		756	74	36	17
Simulation # 181	550	47	22	12	4	2	1	1		577	34	22	12	4	3	1	1		531	35	17	9	4	2	1	1		577	38	20	9	3	2	1	0		558	32	11	7	5	3	1	1		754	71	38	15
Simulation # 182	578	45	20	12	6	3	1	1		566	36	16	10	5	1	1	1		544	39	18	10	6	2	1	0		590	46	23	10	5	3	3	2		540	39	20	11	6	2	1	1		736	90	50	23
Simulation # 183	580	44	24	10	4	3	2	1		547	38	19	5	3	0	0	0		562	33	13	6	1	1	1	0		587	39	15	8	4	2	1	0		543	39	22	14	6	1	1	1		737	73	36	20
Simulation # 184	566	44	23	12	5	1	1	0		545	42	16	11	3	2	2	1		539	42	15	6	3	1	1	0		564	36	20	12	6	1	1	1		545	24	9	7	4	2	0	0		735	70	39	19
Simulation # 185	596	42	23	11	2	2	2	1		567	42	21	7	3	2	2	1		523	39	20	12	6	2	1	1		560	43	23	10	6	4	1	0		534	29	13	6	4	2	2	1		780	61	30	16
Simulation # 186	562	43	21	9	5	2	1	0		558	45	21	7	4	2	1	0		554	42	24	8	5	3	2	0		583	45	23	10	6	5	1	1		531	38	20	9	4	3	2	1		764	73	34	16
Simulation # 187	574	38	16	6	3	2	1	1		558	40	19	13	6	2	0	0		546	41	21	9	3	1	1	1		576	34	18	9	4	3	2	0		537	36	17	7	4	1	1	0		749	83	43	19
Simulation # 188	570	34	18	11	4	2	1	1		549	53	29	14	4	1	1	1		543	25	12	8	6	4	2	1		585	42	24	12	4	3	2	1		525	44	19	10	3	2	1	1		743	72	34	15
Simulation # 189	561	50	24	12	5	3	1	1		556	43	16	8	3	2	1	1		554	31	18	9	4	3	1	1		609	49	27	12	7	3	3	1		528	41	17	11	6	1	1	1		744	78	35	16
Simulation # 190	587	47	27	15	4	3	1	0		589	49	20	11	4	1	1	1		544	40	18	7	2	2	2	0		542	38	24	12	6	2	1	1		541	41	18	7	4	2	2	0		767	67	33	21
Simulation # 191	546	48	26	16	6	2	1	1		580	30	15	8	3	2	2	0		525	38	17	8	4	1	1	0		578	47	17	9	8	3	2	0		528	37	18	7	4	3	2	1		752	70	42	26
Simulation # 192	562	52	23	9	5	2	1	1		567	47	21	8	2	1	1	1		532	45	18	8	6	3	1	0		583	33	14	9	6	3	1	1		543	42	20	10	4	1	1	1		774	65	33	14
Simulation # 193	559	42	24	12	7	4	2	0		571	40	21	7	3	3	1	1		552	37	20	7	4	1	1	1		572	45	25	10	5	3	1	1		536	43	17	6	4	2	1	0		762	78	39	18
Simulation # 194	554	45	22	11	4	1	1	0		520	32	14	8	6	1	1	0		509	46	20	11	7	3	1	0		566	39	21	11	3	2	2	2		546	37	19	8	5	3	1	0		747	86	41	17
Simulation # 195	569	42	21	11	5	4	2	0		571	37	19	12	5	3	1	1		568	41	17	8	4	3	1	1		576	49	19	12	6	2	1	1		539	35	19	9	2	1	1	1		738	65	28	15
Simulation # 196	549	40	20	10	2	1	0	0		572	47	20	13	5	3	1	0		565	31	17	7	4	2	1	1		566	30	14	7	4	3	1	0		522	33	20	7	4	4	1	0		782	76	38	19
Simulation # 197	567	39	19	12	5	2	1	1		557	35	21	10	4	3	0	0		529	43	20	10	5	1	1	0		560	46	20	7	2	1	1	0		523	45	25	11	4	1	1	0		771	79	39	18
Simulation # 198	565	44	22	15	5	3	2	0		551	40	15	7	3	2	1	1		534	41	22	8	3	1	1	1		571	47	25	9	5	2	1	1		529	35	15	9	4	2	2	1		744	73	32	11
Simulation # 199	553	41	17	9	5	4	1	1		540	39	21	11	2	1	1	0		540	32	16	7	3	3	1	0		569	35	16	10	5	1	1	1		530	29	17	5	3	1	1	1		770	77	34	18
Simulation # 200	560	44	18	6	2	1	1	1		554	38	15	7	5	2	1	1		549	37	20	8	4	3	1	0		584	46	24	13	5	1	1	1		546	49	21	10	5	3	2	1		730	77	41	19
Simulation # 201	565	36	17	12	4	2	1	1		559	46	22	14	7	2	1	1		539	36	17	10	5	4	1	0		604	38	20	13	9	2	1	0		529	33	19	13	7	3	1	1		742	79	37	15
Simulation # 202	544	40	18	7	2	2	1	1		577	42	19	11	5	1	0	0		524	34	18	10	5	2	0	0		584	46	21	11	6	1	1	1		551	36	17	11	6	3	1	1		728	78	46	17
Simulation # 203	527	43	20	9	3	2	1	1		543	47	25	14	6	2	1	1		542	37	18	8	3	2	1	0		574	40	23	10	6	3	1	1		530	41	20	10	3	2	1	1		731	87	40	18
Simulation # 204	583	37	19	10	4	2	1	1		583	39	21	11	6	2	1	1		560	45	21	8	4	3	1	0		568	39	24	15	7	3	1	1		540	37	18	12	5	3	2	1		729	69	35	18
Simulation # 205	560	39	21	10	5	2	1	0		574	38	14	6	4	2	1	1		561	40	17	10	4	1	1	0		565	39	18	7	5	3	1	0		528	37	16	7	4	2	1	1		750	78	46	20
Simulation # 206	566	34	25	11	7	2	1	0		567	41	22	11	6	3	1	1		529	37	17	10	6	3	2	1		577	45	22	12	5	2	1	1		547	41	21	8	5	2	1	0		752	77	37	19
Simulation # 207	575	36	16	9	5	2	1	1		582	50	23	9	5	2	2	1		549	33	23	10	5	2	1	1		558	40	20	10	7	3	1	0		546	34	18	6	4	2	0	0		761	82	36	21
Simulation # 208	560	37	19	9	5	3	2	0		540	46	21	12	7	3	2	0		558	37	18	9	2	1	1	1		559	30	17	5	3	2	1	0		541	42	23	11	5	3	2	0		758	69	44	18
Simulation # 209	581	44	20	7	3	2	1	1		551	46	21	10	5	1	1	1		532	37	13	7	6	3	2	0		564	46	22	13	5	1	1	0		537	43	16	10	4	1	1	1		764	68	33	21
Simulation # 210	581	39	22	11	6	5	1	1		583	38	20	8	6	4	3	1		544	35	15	6	3	2	1	1		571	44	22	7	5	3	2	0		514	37	19	10	5	2	1	1		768	73	43	9
Simulation # 211	572	35	16	10	5	3	1	1		566	44	16	8	3	1	1	0		557	37	18	13	6	2	2	1		577	41	17	6	4	3	0	0		525	44	23	14	4	1	1	1		721	75	42	21
Simulation # 212	561	38	19	9	3	2	1	1		547	37	18	11	5	2	2	0		550	36	20	10	6	2	2	1		540	42	22	8	5	3	1	0		548	32	14	11	6	2	1	1		741	82	37	18
Simulation # 213	560	46	24	13	5	2	1	1		551	41	21	8	3	3	2	0		560	36	23	11	7	4	3	1		583	45	24	15	8	2	1	0		512	36	21	4	3	2	1	1		710	73	41	18
Simulation # 214	531	44	26	10	4	2	1	0		584	46	23	14	5	1	1	1		527	35	17	11	6	3	2	0		579	40	21	9	4	3	2	1		538	38	25	10	3	3	2	0		773	70	38	18
Simulation # 215	565	44	15	11	5	1	1	1		544	40	19	12	4	1	1	1		534	39	18	7	3	2	1	1		570	38	24	11	7	3	1	0		517	37	19	10	5	3	1	0		779	81	40	19
Simulation # 216	540	33	16	8	2	2	2	0		567	51	16	10	4	2	2	1		560	38	17	12	6	3	1	1		562	43	21	9	1	1	1	1		552	33	14	8	4	2	1	1		748	75	36	19
Simulation # 217	563	40	16	8	4	1	1	0		550	43	23	6	4	1	1	0		553	44	20	10	5	3	1	0		572	40	22	7	5	1	1	1		534	37	24	12	7	4	2	2		774	86	49	21
Simulation # 218	576	38	21	9	3	1	1	1		547	41	18	8	5	4	2	1		526	35	13	10	5	3	0	0		575	36	21	10	6	2	1	0		550	34	22	8	4	3	1	1		774	84	41	15
Simulation # 219	550	30	16	8	3	2	1	0		558	42	17	8	3	1	1	0		522	37	19	9	4	2	1	1		587	50	24	12	1	1	1	1		530	32	18	8	4	2	1	0		743	77	39	13
Simulation # 220	579	41	20	11	4	2	1	0		572	39	23	9	7	3	3	1		534	40	19	6	5	3	1	1		558	40	14	8	4	2	1	0		558	41	24	11	7	1	1	0		766	72	34	19
Simulation # 221	581	39	27	10	5	2	2	1		552	34	22	11	6	2	1	0		541	31	18	13	8	3	2	1		556	38	18	11	5	2	2	1		519	42	20	8	5	3	1	1		735	76	42	19
Simulation # 222	562	39	16	9	4	3	2	0		556	34	20	7	3	2	1	1		547	29	18	8	4	3	1	0		575	45	24	12	7	3	1	1		519	30	12	9	4	2	2	1		739	76	37	13
Simulation # 223	575	42	23	12	4	2	1	1		570	42	22	10	4	3	1	1		550	33	11	5	3	2	2	1		564	37	17	10	6	2	1	0		538	36	16	10	6	2	1	1		738	68	36	17
Simulation # 224	578	44	19	7	5	2	1	1		577	44	25	10	2	2	1	0		550	39	16	6	2	1	1	1		541	37	22	8	4	1	1	1		537	35	20	7	4	2	1	1		761	71	36	19
Simulation # 225	559	37	23	9	3	1	1	0		545	35	21	10	5	2	1	1		526	45	19	7	4	3	2	1		562	41	19	13	9	5	2	0		545	40	21	10	6	4	3	1		732	69	34	18
Simulation # 226	610	42	24	12	4	3	1	1		549	49	19	9	6	2	2	2		516	43	20	8	2	2	1	1		574	41	25	9	4	1	1	1		567	42	19	12	5	4	1	0		723	72	36	17
Simulation # 227	592	46	21	14	8	2	1	1		538	38	19	10	5	1	1	1		522	36	23	13	5	2	1	1		581	38	20	8	3	2	2	1		516	34	13	9	4	1	1	1		755	64	37	21
Simulation # 228	571	35	17	7	6	3	2	1		532	42	16	7	4	3	1	1		539	31	13	5	3	1	1	0		579	41	18	10	4	1	1	1		552	33	15	9	4	1	1	1		763	76	41	17
Simulation # 229	586	44	18	9	5	2	2	0		568	38	22	10	5	1	1	1		545	24	12	8	5	2	1	0		590	41	20	11	6	1	1	0		543	40	19	6	4	3	3	2		788	82	36	20
Simulation # 230	567	33	19	8	7	3	1	1		548	48	23	13	7	1	1	0		547	43	20	9	4	2	1	1		570	43	17	7	5	2	2	1		520	44	19	9	3	2	1	1		741	74	41	21
Simulation # 231	569	40	18	11	6	3	1	0		563	31	14	9	4	2	1	0		535	40	18	11	3	2	1	1		557	49	24	11	8	2	0	0		544	27	11	4	3	2	2	1		731	82	35	16
Simulation # 232	579	46	23	6	2	2	2	1		571	34	17	11	6	2	1	1		535	37	16	10	6	3	1	0		565	40	19	7	4	3	1	1		537	31	16	12	3	2	1	1		746	70	43	25
Simulation # 233	554	40	21	7	6	2	1	0		553	34	16	8	3	2	1	0		537	35	19	10	4	2	2	0		580	37	20	10	4	3	1	0		548	32	17	4	2	1	1	1		736	74	41	20
Simulation # 234	569	47	23	12	5	3	2	1		552	40	22	12	5	2	1	0		533	50	20	8	5	3	1	0		561	44	23	10	5	3	1	1		531	39	20	9	5	2	1	1		760	86	36	17
Simulation # 235	574	38	21	11	3	2	1	1		558	42	22	8	5	2	2	1		554	26	9	5	3	2	2	0		564	41	16	7	3	2	1	0		509	36	17	8	4	1	1	1		741	82	46	19
Simulation # 236	586	38	16	9	6	4	2	0		573	37	28	11	5	1	1	1		547	38	14	7	4	3	1	0		579	38	17	9	6	3	1	1		533	29	13	9	4	2	1	0		762	80	45	23
Simulation # 237	562	41	18	6	4	1	1	1		569	33	17	10	6	3	2	0		555	41	17	10	4	2	1	1		577	50	24	6	3	2	1	1		536	44	20	8	4	1	1	0		750	83	46	26
Simulation # 238	551	34	18	11	4	1	1	0		559	34	18	5	1	1	1	0		557	27	11	3	3	1	1	0		574	48	23	11	7	2	1	0		545	41	23	13	4	1	1	1		761	74	36	15
Simulation # 239	553	33	18	10	2	1	1	1		572	39	18	11	6	1	1	0		523	35	14	10	4	2	1	0		548	45	26	11	4	2	1	1		530	33	18	10	5	3	1	0		742	77	32	17
Simulation # 240	558	35	18	8	3	2	1	0		533	41	21	10	5	2	1	1		523	38	18	9	5	1	0	0		567	44	18	8	3	2	1	1		533	34	18	10	3	2	1	0		761	63	33	16
Simulation # 241	576	35	14	4	4	4	1	0		578	41	20	10	4	4	1	0		523	39	18	10	3	3	1	0		577	39	25	12	6	3	1	0		543	43	20	12	5	1	1	1		762	69	40	21
Simulation # 242	569	34	17	9	7	2	2	1		585	46	22	4	3	1	1	1		523	44	20	8	6	3	1	1		560	44	23	9	4	3	3	1		541	37	18	7	4	1	1	1		755	81	36	16
Simulation # 243	559	44	25	8	5	2	1	0		545	41	20	9	3	2	1	0		536	35	19	9	3	2	1	1		585	46	20	10	5	1	1	0		558	33	14	5	5	2	1	1		760	69	43	23
Simulation # 244	539	41	24	6	2	2	1	1		555	44	15	8	4	3	1	1		547	36	17	8	4	2	2	0		574	47	26	8	1	1	1	1		515	32	18	7	3	3	1	1		775	71	34	16
Simulation # 245	561	40	23	8	6	3	2	2		568	44	20	10	5	2	2	1		559	30	15	9	3	2	1	1		570	41	22	13	5	3	1	0		551	40	23	8	2	1	1	0		796	79	34	20
Simulation # 246	561	42	21	14	3	2	1	1		585	39	19	7	1	1	1	0		555	32	13	6	2	2	1	0		587	38	19	10	4	1	1	1		539	35	11	4	2	1	1	0		740	79	43	20
Simulation # 247	553	44	26	14	5	2	1	0		560	37	17	6	5	3	1	0		550	44	25	13	5	4	2	0		592	45	24	9	4	2	1	1		547	41	18	9	4	3	1	0		743	74	35	14
Simulation # 248	564	48	23	8	2	1	1	1		545	42	23	9	5	4	2	1		532	42	17	9	4	2	2	1		591	40	23	10	3	1	1	1		531	29	19	11	2	1	1	0		773	70	41	21
Simulation # 249	551	37	22	12	6	2	2	0		571	47	21	8	2	1	1	1		521	38	19	9	6	4	2	1		570	44	18	10	4	2	1	0		548	36	16	8	3	1	1	1		751	77	43	20
Simulation # 250	571	44	20	13	5	4	1	1		564	45	22	10	4	2	1	0		551	38	13	5	2	1	1	1		574	31	19	10	3	2	1	1		531	31	17	11	8	3	1	1		733	78	41	18
Simulation # 251	564	38	20	11	3	1	0	0		558	46	21	11	6	2	2	1		528	33	15	7	3	1	1	1		589	42	23	11	5	2	2	1		534	30	11	7	5	3	3	1		743	82	38	15
Simulation # 252	588	42	20	9	5	1	1	0		554	40	20	8	4	1	1	1		557	38	16	6	3	2	1	1		568	46	18	13	8	3	2	1		518	52	26	13	4	1	1	1		739	74	38	19
Simulation # 253	566	33	15	7	4	2	1	0		561	34	15	10	5	1	0	0		533	42	20	11	2	2	2	1		568	41	17	9	4	1	1	1		565	33	15	7	2	2	1	1		751	70	52	19
Simulation # 254	552	36	23	13	5	2	2	1		562	45	20	13	5	2	1	1		552	40	19	7	3	3	1	0		580	41	20	11	5	2	1	0		547	37	18	11	5	3	1	1		774	70	36	17
Simulation # 255	549	31	20	11	5	3	1	1		554	41	20	11	6	1	1	0		548	47	23	11	6	1	1	1		567	41	23	10	2	1	1	1		537	38	16	7	4	2	2	1		734	80	36	21
Simulation # 256	582	47	28	12	6	2	1	0		545	32	16	11	5	2	1	0		536	42	18	13	7	2	1	0		575	41	24	10	4	1	1	1		539	43	21	9	4	1	1	1		751	72	45	28
Simulation # 257	574	34	18	11	7	3	2	1		550	46	17	9	4	3	2	1		537	41	16	7	4	3	1	1		591	36	15	12	2	1	1	0		515	44	16	5	3	2	1	1		757	68	39	24
Simulation # 258	580	39	22	10	5	2	1	1		545	48	28	13	3	1	1	1		517	49	24	12	4	2	1	1		569	36	22	15	5	1	1	1		546	34	19	11	4	1	0	0		766	77	44	22
Simulation # 259	572	36	13	5	2	1	0	0		541	42	20	10	4	1	1	1		507	40	19	7	4	2	2	0		564	43	22	12	4	3	2	0		515	34	16	6	2	1	1	0		764	73	40	19
Simulation # 260	545	37	17	9	5	3	2	1		535	38	14	8	4	2	1	1		545	41	25	12	5	1	0	0		577	38	21	14	8	3	1	1		523	37	23	8	4	2	1	1		759	89	42	20
Simulation # 261	581	37	19	10	2	1	1	1		548	34	14	10	3	2	1	1		536	34	17	8	4	2	1	0		570	45	22	7	3	2	2	0		537	38	17	9	6	3	1	1		773	81	42	26
Simulation # 262	566	41	19	6	4	2	1	0		538	43	20	9	4	3	1	1		530	39	17	14	7	3	1	1		589	44	22	5	2	2	1	1		537	39	21	12	3	2	0	0		752	75	44	22
Simulation # 263	547	43	21	10	5	1	1	1		550	43	17	6	3	3	2	0		554	34	16	7	2	1	1	0		572	41	19	9	3	1	1	1		547	37	12	6	3	2	1	1		772	71	38	19
Simulation # 264	550	39	22	14	7	3	1	1		536	45	26	10	6	2	1	0		550	32	20	10	4	1	1	1		546	47	16	8	3	1	1	1		526	44	16	8	5	1	1	1		748	80	43	25
Simulation # 265	562	42	22	12	5	2	2	1		579	39	22	11	5	1	1	0		557	39	19	8	3	2	2	1		580	32	20	11	6	3	1	0		524	32	15	6	3	1	1	0		716	72	40	19
Simulation # 266	559	37	18	7	4	2	2	1		557	45	20	9	4	4	1	0		537	32	16	6	2	2	2	0		568	54	24	10	6	4	3	1		527	39	20	8	7	2	1	1		738	73	36	16
Simulation # 267	595	43	20	9	5	3	2	1		562	40	20	7	4	3	1	1		532	41	18	9	6	4	3	1		585	43	17	10	5	2	2	0		522	37	19	9	5	3	1	1		727	86	42	20
Simulation # 268	564	43	20	6	4	1	1	1		546	42	19	10	5	2	1	1		551	41	18	8	6	3	1	1		560	35	16	9	4	3	1	1		549	37	19	13	5	4	2	1		745	65	42	21
Simulation # 269	570	46	20	9	3	2	1	1		556	35	17	9	6	3	2	1		540	35	17	9	6	2	1	1		556	36	21	12	10	3	1	0		518	33	14	9	6	3	2	0		745	66	40	19
Simulation # 270	588	45	24	10	4	1	1	0		576	38	20	8	5	3	2	1		537	33	17	8	5	3	1	1		581	44	20	9	3	2	1	0		524	47	28	6	3	1	1	0		746	72	39	25
Simulation # 271	568	38	21	8	4	2	1	0		585	34	19	10	5	3	0	0		544	38	20	6	4	2	1	1		571	50	31	13	5	4	1	0		537	38	22	7	5	4	1	0		775	71	33	23
Simulation # 272	538	49	26	11	4	3	3	1		553	36	15	9	2	2	1	1		558	31	17	11	5	2	2	1		585	42	22	7	5	2	2	0		557	35	16	8	5	2	1	0		765	71	38	17
Simulation # 273	574	35	20	8	4	1	1	0		541	38	23	10	6	2	1	0		541	42	19	12	4	1	1	1		552	39	16	7	3	2	1	1		539	33	16	6	6	2	1	0		751	69	40	22
Simulation # 274	569	50	25	7	3	1	1	1		550	42	25	13	3	3	1	1		552	40	17	10	4	3	2	0		584	44	20	7	4	3	1	1		516	30	16	10	3	1	1	1		727	76	37	16
Simulation # 275	567	35	18	11	6	2	1	1		537	45	16	7	3	1	0	0		540	40	17	11	6	4	1	0		578	38	18	8	4	1	1	1		543	36	18	9	2	1	1	0		770	73	37	20
Simulation # 276	587	38	14	8	3	1	1	0		568	39	18	6	2	2	2	0		541	40	25	14	5	3	2	1		578	46	17	8	6	2	1	0		505	35	18	10	2	1	1	0		754	79	33	17
Simulation # 277	570	44	22	11	6	4	1	0		558	40	22	11	6	3	3	1		540	38	13	4	4	3	0	0		569	42	26	14	4	4	1	0		539	44	21	9	3	1	1	1		770	82	44	21
Simulation # 278	556	39	18	6	3	2	1	0		569	37	14	9	4	1	0	0		558	32	15	11	5	2	2	1		581	33	20	12	7	1	1	1		517	35	17	6	5	1	1	1		760	67	36	19
Simulation # 279	573	44	23	7	4	1	1	1		540	52	28	18	3	1	1	0		515	33	16	8	3	1	1	0		577	38	19	10	4	2	1	0		550	36	18	7	3	1	1	1		760	70	38	17
Simulation # 280	576	37	20	11	8	4	1	0		566	30	13	8	4	1	1	1		541	41	21	8	5	3	1	1		590	42	19	9	4	2	1	0		542	36	14	8	4	3	1	0		774	72	36	17
Simulation # 281	549	40	20	12	8	5	2	1		559	35	14	7	3	2	1	1		539	39	23	8	4	1	1	1		584	40	17	10	4	2	1	1		540	32	14	8	3	2	2	1		768	72	38	24
Simulation # 282	567	41	21	6	3	3	0	0		563	50	22	9	3	1	1	1		566	34	18	8	5	5	1	0		581	49	24	16	6	2	1	0		527	32	15	7	5	2	1	1		740	70	36	18
Simulation # 283	553	43	25	11	4	3	1	0		563	41	20	8	5	1	1	1		537	34	17	10	5	1	1	0		582	47	26	8	4	2	1	1		537	38	16	4	4	2	2	1		740	72	29	18
Simulation # 284	560	43	24	12	5	2	1	0		550	38	21	13	4	1	1	1		537	42	20	12	6	5	1	1		571	39	20	10	6	5	1	0		531	38	20	8	5	2	2	0		768	76	50	25
Simulation # 285	553	42	21	7	4	3	3	1		537	40	17	11	8	3	1	1		553	43	19	10	6	2	1	0		584	46	23	9	5	3	1	1		542	45	19	10	7	3	1	1		745	66	41	17
Simulation # 286	574	37	14	6	4	1	1	1		553	42	17	10	4	2	2	0		553	39	16	10	5	2	1	0		565	40	22	11	6	4	1	1		512	45	21	10	6	2	2	1		791	71	36	22
Simulation # 287	576	39	17	12	6	3	2	1		543	40	20	14	4	1	1	0		543	37	17	8	4	2	2	2		550	39	25	10	8	3	1	0		542	39	18	6	2	2	1	0		776	82	41	17
Simulation # 288	573	36	21	11	5	3	1	0		556	36	16	12	4	3	2	1		543	35	17	11	5	3	1	0		569	37	20	13	6	5	2	1		529	47	23	13	2	1	1	1		766	75	44	16
Simulation # 289	556	36	20	5	1	1	1	0		575	43	14	8	4	3	2	1		535	30	17	9	6	1	1	0		581	34	21	12	7	2	1	1		529	38	19	7	4	1	1	0		746	73	34	18
Simulation # 290	580	41	22	10	5	2	2	1		546	41	22	12	5	2	2	1		546	43	26	10	4	3	1	1		578	42	23	9	5	4	0	0		526	35	17	6	3	1	1	0		764	79	44	21
Simulation # 291	554	34	21	7	3	2	1	0		538	49	26	11	5	2	2	0		543	30	20	9	4	2	1	0		571	41	24	12	5	2	1	1		537	34	22	12	8	3	1	1		737	74	43	21
Simulation # 292	558	50	22	11	9	3	2	1		545	36	22	12	4	1	1	0		551	29	13	7	4	3	2	1		608	43	21	11	5	3	1	0		538	46	21	11	6	3	1	0		750	77	41	23
Simulation # 293	569	44	28	13	4	2	1	1		560	36	22	11	4	1	1	1		557	31	13	6	3	2	2	0		581	47	24	10	3	2	1	1		556	41	17	9	3	2	2	2		738	81	36	18
Simulation # 294	575	42	20	11	5	4	0	0		555	33	21	12	5	3	1	0		557	40	23	15	6	2	2	1		564	44	21	10	8	3	2	1		578	38	15	8	3	1	1	1		754	61	28	17
Simulation # 295	572	48	28	12	3	2	2	1		545	41	16	13	6	2	1	1		523	42	18	11	6	3	2	1		565	48	20	10	5	2	1	0		520	39	19	7	5	1	1	0		764	72	37	24
Simulation # 296	567	48	22	8	4	2	1	1		583	38	22	13	5	4	3	0		553	47	21	14	5	2	1	1		552	36	21	11	6	3	1	1		530	38	25	13	5	1	1	0		750	80	44	16
Simulation # 297	583	49	21	9	6	2	1	1		551	44	22	11	4	1	1	1		527	38	20	12	5	1	1	1		594	45	14	4	4	2	1	0		538	44	23	10	4	2	2	1		752	79	38	19
Simulation # 298	560	41	22	12	5	2	1	1		567	48	16	9	6	1	1	1		555	35	21	8	2	2	2	1		574	50	26	16	6	2	1	1		543	33	18	11	5	3	2	1		757	73	43	19
Simulation # 299	563	46	23	9	2	1	1	0		568	46	24	10	6	2	1	1		531	30	16	9	6	2	1	1		564	54	28	12	5	2	1	0		566	37	21	13	4	2	1	1		715	84	38	15
Simulation # 300	565	42	19	10	4	1	1	1		567	40	21	6	3	2	2	0		536	35	14	6	3	2	1	0		566	51	24	12	6	2	2	1		542	34	16	12	7	2	2	1		777	75	40	22
Simulation # 301	572	44	21	6	4	3	2	1		567	43	21	11	4	3	3	0		563	36	18	8	5	1	1	0		567	45	24	12	6	2	1	0		505	45	18	10	6	4	1	1		739	77	41	18
Simulation # 302	567	35	16	7	4	2	1	0		561	42	17	8	6	2	1	0		547	38	17	6	3	1	1	1		586	43	22	13	7	5	2	0		535	39	21	7	3	1	1	0		741	76	39	16
Simulation # 303	579	34	24	14	5	3	2	1		562	43	20	11	5	2	1	1		538	38	19	7	5	2	1	0		547	45	22	9	5	3	2	1		540	32	19	9	5	2	1	1		741	79	42	18
Simulation # 304	571	45	24	11	3	1	1	1		556	42	22	13	7	4	1	1		525	41	17	7	6	3	2	0		551	45	26	14	7	2	0	0		534	42	21	10	5	2	2	0		768	70	41	15
Simulation # 305	560	45	22	12	7	3	1	0		581	48	23	8	3	2	1	1		564	42	20	8	5	2	0	0		564	40	18	9	6	1	1	1		547	31	13	6	4	2	1	0		721	71	29	15
Simulation # 306	587	41	19	11	4	2	0	0		550	34	17	5	3	2	0	0		536	34	16	10	3	1	1	1		560	41	25	10	6	2	2	1		535	38	20	11	5	1	1	1		732	69	39	21
Simulation # 307	598	39	18	10	6	2	1	1		537	33	12	4	3	2	1	1		515	41	19	10	4	2	1	1		584	36	18	7	4	2	2	1		548	36	19	10	3	2	1	0		757	72	42	18
Simulation # 308	563	49	17	9	5	3	2	1		561	45	23	9	5	2	2	1		527	36	13	6	3	2	1	0		559	41	18	13	6	1	1	0		536	42	15	7	3	1	1	1		766	69	29	13
Simulation # 309	569	40	17	7	3	2	1	1		570	44	24	8	4	2	1	0		525	32	18	4	3	2	1	1		580	37	22	9	4	1	1	1		563	40	20	10	4	1	1	1		754	79	41	15
Simulation # 310	556	44	17	7	2	2	1	1		558	44	24	12	6	3	2	0		537	51	27	7	3	2	1	1		593	40	18	7	4	3	2	0		556	43	26	10	5	3	1	0		742	79	40	16
Simulation # 311	565	41	23	9	6	5	3	1		544	41	21	13	6	2	1	1		534	35	20	8	4	2	2	0		552	45	21	9	4	2	2	0		530	39	24	12	7	1	1	1		741	75	43	21
Simulation # 312	561	38	16	9	5	4	2	1		553	41	23	12	3	1	1	1		543	46	26	11	4	1	1	0		570	46	21	8	5	2	2	0		527	36	19	9	2	1	1	1		775	77	44	22
Simulation # 313	580	36	21	8	3	2	2	0		549	40	22	11	5	1	1	0		545	39	18	9	3	1	1	1		579	37	17	9	6	3	1	1		543	42	21	11	7	2	2	1		770	87	44	21
Simulation # 314	561	39	17	9	4	1	1	0		555	35	16	8	4	1	1	1		548	41	21	7	5	3	2	1		555	46	26	15	6	2	1	1		530	42	18	10	4	2	1	1		742	76	43	21
Simulation # 315	568	43	23	12	4	2	1	0		553	36	20	10	9	2	1	1		560	34	14	7	3	2	1	1		596	43	19	6	3	2	2	2		553	34	17	7	4	2	1	1		714	73	35	15
Simulation # 316	567	49	22	10	5	2	1	0		555	44	20	14	6	5	1	0		543	39	20	9	3	2	0	0		572	49	24	13	7	4	2	1		523	29	11	8	4	1	1	0		748	75	36	21
Simulation # 317	548	41	19	9	5	2	1	0		556	41	18	9	5	3	1	0		562	44	18	6	2	1	1	0		567	45	23	12	6	3	1	1		501	36	20	9	6	2	2	0		782	82	47	19
Simulation # 318	590	49	22	4	4	1	1	1		568	45	19	7	3	2	1	1		548	35	19	11	3	1	1	1		576	39	21	11	4	2	1	1		546	32	19	9	3	2	1	0		734	70	36	18
Simulation # 319	534	45	23	10	6	4	1	1		570	40	14	8	3	2	2	1		553	39	16	8	5	2	1	0		576	48	21	7	7	5	2	1		515	37	21	7	4	3	3	1		757	77	38	21
Simulation # 320	569	41	16	7	5	2	2	0		544	37	13	6	1	1	1	1		545	37	23	11	5	3	2	1		574	40	18	4	1	1	1	1		526	43	19	9	5	2	1	1		758	67	31	14
Simulation # 321	579	44	18	8	4	2	0	0		535	37	19	7	5	3	2	1		543	35	17	7	7	2	1	0		586	45	22	11	3	1	1	1		525	31	13	8	4	2	1	1		751	69	34	17
Simulation # 322	595	43	20	9	5	3	1	0		566	39	14	8	2	2	2	1		558	41	19	9	6	3	1	0		599	46	24	9	5	2	1	1		537	41	20	9	3	1	1	1		757	88	39	19
Simulation # 323	553	38	11	5	2	1	1	1		542	43	22	11	6	5	1	1		523	39	17	10	4	2	2	0		565	37	20	8	6	5	1	0		539	40	21	9	2	1	1	1		748	71	37	16
Simulation # 324	582	39	20	13	5	2	1	1		551	45	18	9	6	2	1	1		544	45	18	6	2	2	1	0		564	33	18	8	4	2	0	0		551	37	15	4	3	2	1	1		773	73	42	16
Simulation # 325	554	42	21	7	3	1	1	1		549	42	20	7	4	1	1	1		555	33	17	5	3	1	1	1		586	40	19	6	5	2	1	0		536	45	28	12	5	1	1	1		752	87	50	24
Simulation # 326	590	43	22	10	6	4	3	2		553	43	21	7	1	1	1	1		544	33	15	6	4	2	1	0		578	41	24	13	3	2	2	0		553	38	19	10	5	4	1	1		733	78	46	23
Simulation # 327	579	40	22	9	5	3	1	1		575	37	20	9	4	2	2	1		532	38	19	8	4	3	1	0		567	48	25	12	5	2	2	1		554	36	19	10	3	2	2	1		733	73	33	17
Simulation # 328	554	41	16	8	6	2	1	1		551	38	20	7	3	2	1	0		555	42	20	11	7	4	2	1		560	43	22	8	4	2	1	1		559	45	24	10	6	3	1	1		756	63	32	14
Simulation # 329	589	40	22	8	7	4	1	0		560	42	15	5	4	2	2	0		538	36	17	7	5	2	1	1		551	42	16	5	4	3	2	0		542	37	17	8	3	1	1	1		761	71	37	14
Simulation # 330	587	38	24	9	4	3	1	0		558	42	21	9	5	3	1	0		524	33	15	9	3	2	2	0		540	32	16	8	7	3	1	0		547	41	27	10	6	3	0	0		740	71	37	21
Simulation # 331	544	35	14	5	4	1	1	0		569	42	18	9	4	3	1	0		513	37	22	10	2	2	2	1		551	42	22	9	4	2	1	0		530	46	23	9	3	2	2	1		770	75	33	14
Simulation # 332	575	46	30	13	4	3	2	1		536	46	18	8	4	2	1	1		553	42	22	11	4	2	1	0		567	45	20	9	4	3	1	0		534	32	17	6	4	3	2	0		753	78	41	17
Simulation # 333	562	38	23	11	5	2	1	1		542	39	20	8	4	4	1	0		513	40	28	10	2	2	2	2		547	43	20	9	3	2	1	1		554	40	24	13	4	1	1	0		726	69	37	17
Simulation # 334	562	38	16	6	6	1	1	1		571	41	23	12	7	2	2	0		553	38	12	6	4	3	1	1		585	47	20	7	3	1	1	0		533	37	17	7	3	3	1	0		738	74	38	19
Simulation # 335	568	42	18	5	4	2	1	0		574	35	21	11	6	2	1	1		559	28	12	6	5	2	1	0		560	47	21	10	7	3	1	0		528	32	15	5	2	2	2	1		749	75	38	21
Simulation # 336	580	46	22	9	5	2	1	0		579	43	23	10	7	4	1	1		551	27	16	8	4	2	1	0		561	42	22	9	4	1	1	0		532	38	23	9	2	1	0	0		752	78	43	18
Simulation # 337	572	41	23	12	6	4	1	0		554	43	22	7	4	2	1	0		549	41	21	11	7	3	1	1		594	40	21	10	3	1	1	1		512	42	20	9	6	5	2	1		744	75	29	14
Simulation # 338	556	37	18	10	4	2	2	1		549	33	18	8	5	2	2	2		537	37	18	9	5	2	1	1		550	39	21	12	6	4	1	1		578	37	14	7	5	2	1	0		760	83	46	22
Simulation # 339	553	40	17	7	4	1	1	1		532	37	14	10	6	2	1	1		534	37	17	10	5	4	2	1		563	38	18	7	4	3	3	1		543	35	19	12	6	3	1	1		743	75	39	18
Simulation # 340	568	46	14	6	4	2	2	1		552	46	20	9	5	3	1	0		553	32	15	6	4	2	2	0		590	49	25	11	5	2	1	0		531	40	23	12	5	2	1	0		753	73	36	19
Simulation # 341	569	39	18	9	3	3	3	1		557	42	24	12	4	2	1	1		534	44	24	14	8	3	3	1		568	41	26	15	6	3	1	1		540	35	15	6	2	1	1	1		710	76	40	13
Simulation # 342	553	44	24	10	5	1	1	1		567	41	15	10	7	2	1	1		544	38	23	9	5	4	3	1		576	52	20	10	5	3	1	0		512	37	17	10	6	2	1	0		756	68	38	23
Simulation # 343	551	31	14	7	5	1	0	0		547	39	14	5	4	2	1	0		539	39	15	11	6	3	1	0		561	40	18	9	4	4	1	1		542	41	19	7	4	2	1	1		742	68	34	18
Simulation # 344	560	41	20	12	4	1	1	1		561	34	19	10	5	2	2	0		530	40	21	8	5	3	2	1		573	39	21	11	5	2	1	0		528	38	15	7	4	2	1	0		732	79	43	22
Simulation # 345	563	37	15	11	5	2	1	1		561	33	17	12	5	3	2	0		549	40	18	12	3	3	2	0		603	41	15	6	1	1	1	1		551	37	24	10	3	2	2	1		793	85	41	26
Simulation # 346	562	33	16	7	4	3	2	1		584	44	22	8	3	3	1	1		561	36	21	15	6	3	2	1		583	42	23	10	3	2	2	1		568	42	17	11	6	3	1	1		745	71	36	20
Simulation # 347	561	41	27	9	5	2	2	1		555	52	21	9	3	1	1	0		560	34	14	9	7	3	2	2		564	43	21	12	6	3	1	1		532	36	17	7	5	2	2	1		737	78	41	21
Simulation # 348	547	47	19	5	3	3	3	1		554	35	18	6	2	1	0	0		574	38	21	10	4	3	1	1		568	45	25	13	9	2	1	1		544	44	20	9	4	1	1	1		735	78	44	22
Simulation # 349	557	36	20	8	5	3	2	1		539	47	23	10	2	1	1	0		560	38	27	10	2	2	1	1		579	39	23	12	6	2	2	0		538	47	23	14	4	2	1	0		748	73	36	22
Simulation # 350	578	39	26	10	7	2	2	1		556	31	13	10	5	1	1	1		546	39	22	12	5	2	1	1		568	35	20	11	4	1	1	1		516	36	17	9	6	1	1	1		737	74	40	18
Simulation # 351	569	45	16	10	3	1	1	1		555	40	25	14	4	2	0	0		547	33	20	9	6	2	1	1		576	42	20	9	4	3	0	0		544	38	13	8	2	2	1	1		756	66	36	11
Simulation # 352	551	44	22	10	5	2	1	1		553	38	17	9	4	1	1	0		564	44	24	11	4	2	1	1		560	44	18	7	4	3	2	0		525	35	17	10	4	3	1	0		741	90	44	21
Simulation # 353	567	41	21	12	6	2	2	2		563	37	18	9	3	1	1	1		525	39	17	4	3	2	1	0		574	34	15	10	3	1	1	1		504	33	16	10	6	3	3	1		726	87	44	21
Simulation # 354	588	43	21	12	2	2	1	0		562	39	23	11	5	2	1	0		536	39	16	11	7	1	1	0		577	43	20	10	5	3	2	1		503	33	17	7	4	3	2	1		747	83	42	14
Simulation # 355	550	46	22	8	5	2	1	0		557	42	22	8	5	4	3	2		540	37	17	10	4	2	1	1		581	47	24	9	3	2	1	1		499	43	17	11	6	3	1	1		752	80	46	23
Simulation # 356	567	38	21	8	4	2	2	1		540	42	25	8	5	3	1	1		540	36	22	9	5	2	0	0		548	46	25	15	7	4	1	1		560	45	14	6	5	3	2	0		773	83	44	22
Simulation # 357	545	49	23	12	6	3	1	0		543	38	17	9	3	3	1	1		551	38	20	12	5	3	2	1		561	35	21	14	7	3	1	1		519	37	18	11	3	1	1	0		752	82	43	21
Simulation # 358	556	34	21	6	3	2	1	0		563	43	18	10	4	4	1	1		542	45	21	10	7	3	1	0		597	42	15	8	2	1	1	1		548	47	22	8	6	2	2	1		751	86	43	16
Simulation # 359	567	43	17	12	6	2	2	1		562	38	23	8	3	1	0	0		546	45	21	7	4	2	1	1		575	47	21	12	5	3	2	1		529	39	25	9	5	2	1	0		765	73	42	19
mean shuffled	565.164	41.0139	20.2033	9.5376	4.53482	2.27019	1.26462	0.632312	#DIV/0!	558.437	40.4262	19.5265	9.46797	4.51811	2.11142	1.1922	0.571031	#DIV/0!	542.184	37.961	18.2841	8.73538	4.28691	2.16435	1.19777	0.506964	#DIV/0!	571.844	42.117	20.8301	9.95265	4.78273	2.33983	1.25905	0.604457	#DIV/0!	536.791	37.4067	18.4095	8.87187	4.34819	2.11421	1.23677	0.67688	#DIV/0!	752.487	74.9081	38.6128	18.6574
sd	13.404	4.93899	3.40069	2.27891	1.5054	0.95249	0.602279	0.542767	#DIV/0!	13.2349	4.75483	3.42089	2.36559	1.5223	0.944764	0.597336	0.523041	#DIV/0!	14.0687	4.78634	3.17683	2.18032	1.46795	0.923474	0.54146	0.527809	#DIV/0!	13.9592	4.69847	3.23504	2.27458	1.56163	1.00075	0.600065	0.563887	#DIV/0!	14.1302	4.77149	3.25233	2.14561	1.42158	0.980704	0.561509	0.508361	#DIV/0!	15.6968	6.05006	4.64769	3.32456
z score	4.76242	6.6787	4.64514	2.39694	2.30183	0.766207	1.22099	0.677433	#VALUE!	6.69159	3.06506	2.76932	1.91581	2.28725	1.999	-0.321763	-1.09175	#VALUE!	7.52141	4.60456	3.68792	3.33191	2.52944	0.904904	1.4816	-0.960506	#VALUE!	6.88838	5.50881	5.6166	2.21902	1.41984	-0.339577	-0.431708	0.701458	#VALUE!	7.09182	4.73507	2.94881	3.32219	2.56884	-1.13613	-0.421665	0.635611	#VALUE!	9.90726	-0.811244	0.0833072	0.704641
fold	1.11295	1.80427	1.78188	1.57272	1.76413	1.32147	1.5815	1.5815	#VALUE!	1.15859	1.3605	1.48516	1.47867	1.77065	1.89446	0.838785	0	#VALUE!	1.19517	1.58057	1.64077	1.83163	1.86615	1.3861	1.66977	0	#VALUE!	1.16815	1.61455	1.87229	1.50714	1.4636	0.854762	0.794248	1.65438	#VALUE!	1.18668	1.60399	1.52096	1.80345	1.83985	0.472991	0.808559	1.47737	#VALUE!	1.20666	0.934479	1.01003	1.12556
[truncated: 425 more columns]

## Sheet: (c) z-scores
Training_set	5species	10species	11species	12species	13species	14species	15species	16species
adult_circulatory:	4.76242	6.6787	4.64514	2.39694	2.30183	0.766207	1.22099	0.677433
adult_foregut:	6.69159	3.06506	2.76932	1.91581	2.28725	1.999	-0.321763	-1.09175
adult_mesoderm.mapping1:	7.52141	4.60456	3.68792	3.33191	2.52944	0.904904	1.4816	-0.960506
adult_midgut:	6.88838	5.50881	5.6166	2.21902	1.41984	-0.339577	-0.431708	0.701458
adult_muscle:	7.09182	4.73507	2.94881	3.32219	2.56884	-1.13613	-0.421665	0.635611
adult_pns:	9.90726	-0.811244	0.0833072	0.704641	1.76216	2.20545	1.69136	0.347422
adult_somatic_muscle:	8.92754	1.73975	3.45126	5.40736	5.84449	2.60848	2.80307	2.35537
amnioserosa.mapping1:	6.55444	8.95991	9.36832	6.08541	2.66472	0.568925	2.11935	-0.86168
antennal_lobe:	9.72717	7.9329	4.07613	5.21511	4.56489	2.4421	-0.204767	0.958764
blastoderm.mapping1:	2.79567	4.58967	4.83342	3.45542	3.6671	3.78345	2.282	0.591342
cardiac.mapping1:	6.16949	5.36526	6.07942	6.39351	4.88395	4.31732	3.69695	-0.927175
disc.mapping2:	8.41771	7.97266	9.2906	6.75273	6.03196	3.00991	-1.30438	-0.211301
emb-larval_opticlobe:	8.38113	8.26246	9.71875	8.62857	8.93924	3.55607	-0.975196	-0.193565
emb-larv_circulatory_system:	6.39031	6.86737	8.17314	7.64177	8.55956	5.16675	0.582431	4.00748
emb-larv_excretory:	8.34286	9.603	12.6078	9.26847	1.79737	-0.40837	-1.08638	-0.185704
emb-larv_fat_body:	7.73892	5.17591	4.30602	4.66574	5.24775	3.24298	0.125358	-0.256096
emb-larv_foregut:	7.19171	7.08671	8.15687	9.83175	4.86342	1.12599	0.61175	4.48062
emb-larv_hindgut:	7.72537	4.89576	5.54141	3.5995	3.98332	4.83893	1.77157	-0.243589
emb-larv_visceral:	7.88464	4.84228	5.12909	5.6379	3.16531	4.13862	0.592878	4.34793
embryonic_epidermis:	6.8147	10.8169	8.38439	6.42393	2.07224	0.127518	-0.708805	-0.193565
embryonic_midgut:	6.78544	7.41987	7.7274	8.34525	5.98958	4.69333	2.48921	-0.187696
embryonic_muscle:	6.31018	6.26835	6.95237	5.72164	5.39072	6.18742	2.44904	3.90839
embryonic_salivary:	9.35584	4.23152	5.45618	4.41169	2.13987	3.51836	3.48903	-0.239927
embryonic_sense_organ:	6.88414	5.9907	6.67388	3.68642	3.38876	3.3806	2.89564	2.87782
embryonic_somatic_muscle:	7.01128	8.50272	7.51949	6.94434	5.05317	2.00903	2.26333	4.00748
embryonic_trachea:	6.96312	5.22821	4.22752	2.4218	1.52774	-0.431708	-1.20162	-0.215679
eye_disc:	7.33067	5.65548	4.56475	3.29235	2.86454	1.83899	2.26429	4.62361
eye.mapping1:	7.19252	7.06655	6.34252	5.42636	2.74047	4.93088	2.69729	5.36993
fat_body.mapping1:	6.93486	4.34715	4.03826	2.61478	1.1338	3.6928	1.99574	-0.249917
female_reproductive:	7.93331	5.96526	6.28658	6.70896	5.1583	1.94415	1.56511	-0.259625
haltere_disc:	7.21205	10.3498	12.0012	15.3334	10.8589	6.41348	4.40876	3.81785
leg_disc:	8.58268	7.73042	6.70113	5.17296	3.15201	2.17769	0.529648	4.11257
malpig.mapping1:	8.53889	13.5472	11.7831	7.69308	4.24677	-0.207013	-1.07762	-0.215679
mapping1.dorsal_ectoderm:	3.15163	8.37938	6.759	4.25589	1.87603	3.86275	2.70729	5.61678
mapping1.ectoderm:	3.73657	9.11433	10.9242	7.37697	0.0210607	-0.355243	-1.0212	-0.195376
mapping1.glia:	7.28799	5.75119	4.69154	5.85369	7.30073	3.33434	4.58477	-0.247831
mapping1.salivary_gland:	6.33415	12.0025	10.6529	7.62413	5.26439	4.09343	4.19006	-0.208526
mapping1.somatic_muscle:	3.35171	7.81646	10.0141	7.13968	7.00269	3.28077	0.677678	4.95724
mapping1.tracheal_system:	2.71772	7.6042	7.76976	5.93967	3.07531	2.44677	0.330143	4.11257
mapping1.ventral_ectoderm:	1.3377	4.42245	4.00042	3.69876	1.96566	-0.301238	0.725092	4.1113
mapping1.visceral_mesoderm:	4.73007	10.7125	10.8907	9.6188	8.79761	7.23014	2.18043	4.22569
mapping2.ectoderm:	2.41562	4.79214	5.12925	3.87067	-0.98409	-0.298843	-1.08819	-0.193565
mapping2.glia:	5.60598	4.77655	6.18818	7.66617	4.97879	5.70842	2.97962	-0.246203
mapping2.mesoderm:	2.30236	7.19966	8.31042	8.46736	6.842	5.73615	0.654129	4.62361
mapping2.wing:	1.92959	6.62085	7.55475	3.13137	1.97112	1.99266	0.977857	-0.208829
mesectoderm.mapping1:	5.83478	6.30885	6.59683	5.50346	1.45044	2.42768	4.14097	4.62361
mesoderm.mapping1:	6.55491	6.50805	7.39408	7.93228	7.503	7.37317	2.63764	6.95576
myoblast:	7.73797	5.8354	3.56685	3.07547	3.39814	5.29396	1.92165	3.50256
* red text indicated not significant at P < 0.05

## Sheet: (d) fold enrichment
Training_set	5 species	10 species	11 species	12 species	13 species	14 species	15 species	16 species
adult_circulatory:	1.11295	1.80427	1.78188	1.57272	1.76413	1.32147	1.5815	1.5815
adult_foregut:	1.15859	1.3605	1.48516	1.47867	1.77065	1.89446	0.838785	0
adult_mesoderm.mapping1:	1.19517	1.58057	1.64077	1.83163	1.86615	1.3861	1.66977	0
adult_midgut:	1.16815	1.61455	1.87229	1.50714	1.4636	0.854762	0.794248	1.65438
adult_muscle:	1.18668	1.60399	1.52096	1.80345	1.83985	0.472991	0.808559	1.47737
adult_pns:	1.20666	0.934479	1.01003	1.12556	1.43744	1.86979	1.78607	1.22109
adult_somatic_muscle:	1.21111	1.20462	1.62488	2.29526	2.84054	2.142	2.3413	3.08155
amnioserosa.mapping1:	1.19122	2.39333	3.17699	2.73654	2.03208	1.25305	2.06322	0
antennal_lobe:	1.25128	2.06223	1.77899	2.36348	2.59768	2.12112	0.90201	1.98343
blastoderm.mapping1:	1.07034	1.48186	1.67684	1.72084	2.07514	2.57744	2.06718	1.45935
cardiac.mapping1:	1.16223	1.75476	2.15806	2.66222	2.79813	2.84469	2.71285	0
disc.mapping2:	1.43612	2.76904	3.68377	3.3497	3.79559	2.55516	0	0
emb-larval_opticlobe:	1.50737	3.32465	4.42052	4.73835	5.23324	2.63971	0	0
emb-larv_circulatory_system:	1.36209	2.78639	3.65439	4.15466	5.22036	3.81915	1.54741	18.8947
emb-larv_excretory:	1.48317	3.54143	4.94945	4.68975	1.88451	0.797778	0	0
emb-larv_fat_body:	1.33122	2.00194	2.13797	2.60872	3.24467	2.64749	1.08788	0
emb-larv_foregut:	1.41028	2.71704	3.56974	4.65445	3.40688	1.57112	1.47131	23.9333
emb-larv_hindgut:	1.35224	2.03414	2.51322	2.22751	2.7916	3.4686	2.45051	0
emb-larv_visceral:	1.41055	2.23112	2.63436	3.12344	2.52817	2.99167	1.53419	22.4375
embryonic_epidermis:	1.50668	4.24634	4.09728	3.91068	2.03208	1.07164	0	0
embryonic_midgut:	1.41199	2.93548	3.49513	4.2586	3.96929	3.24153	3.26364	0
embryonic_muscle:	1.36582	2.63583	3.34342	3.21493	3.54568	3.91921	3.14912	16.3182
embryonic_salivary:	1.37093	1.7751	2.33783	2.4873	1.88397	2.85298	3.10375	0
embryonic_sense_organ:	1.27206	2.06542	2.53475	2.15263	2.38035	2.85676	3.21493	13.2963
embryonic_somatic_muscle:	1.33787	2.93701	3.20918	3.62149	3.42884	2.02064	2.75096	18.8947
embryonic_trachea:	1.38982	2.34035	2.43785	1.99814	1.78829	0.794248	0	0
eye_disc:	1.34931	2.21371	2.26174	2.21241	2.34422	1.97253	2.7722	22.4375
eye.mapping1:	1.44129	2.79054	3.0006	3.23008	2.3838	3.44365	3.30876	29.9167
fat_body.mapping1:	1.28449	1.83244	2.06653	1.97494	1.52119	2.85374	2.48443	0
female_reproductive:	1.36635	2.22406	2.60572	3.21013	3.42604	2.06619	2.11799	0
haltere_disc:	1.41532	3.56539	4.94876	6.85987	6.46847	4.08884	5.03271	17.0952
leg_disc:	1.39006	2.54485	2.71513	2.75655	2.49801	2.10763	1.39689	19.9444
malpig.mapping1:	1.501	4.5596	4.78511	4.3253	3.17699	0.893035	0	0
mapping1.dorsal_ectoderm:	1.18444	3.16478	3.2904	2.75624	1.8569	2.89516	3.88108	32.6364
mapping1.ectoderm:	1.1899	3.34992	4.59079	3.98004	1.00985	0.834884	0	0
mapping1.glia:	1.31334	2.01717	2.10169	2.81335	4.05759	2.69587	3.98889	0
mapping1.salivary_gland:	1.32977	3.70269	4.15129	4.05441	3.52345	3.163	5.52308	0
mapping1.somatic_muscle:	1.17166	3.00129	4.08637	3.6336	4.37212	2.4094	1.60268	25.6429
mapping1.tracheal_system:	1.11299	2.39037	2.98727	2.93426	2.4275	2.29393	1.27758	19.9444
mapping1.ventral_ectoderm:	1.07068	2.13356	2.29277	2.46397	1.93271	0.838785	1.66204	17.95
mapping1.visceral_mesoderm:	1.21989	3.28937	4.07491	4.57865	4.98117	4.60256	2.34641	21.1176
mapping2.ectoderm:	1.12381	2.24336	2.69722	2.46453	0.532641	0.856802	0	0
mapping2.glia:	1.23062	1.9413	2.55213	3.43952	3.16836	4.11461	3.46302	0
mapping2.mesoderm:	1.10153	2.60409	3.40232	3.98628	4.08987	3.85193	1.55411	22.4375
mapping2.wing:	1.1206	3.11597	3.78169	2.4236	1.92129	1.90426	2.13095	0
mesectoderm.mapping1:	1.28906	2.47495	2.84619	3.05445	1.6582	2.23444	4.46888	22.4375
mesoderm.mapping1:	1.23877	2.01018	2.58022	3.2233	3.50719	4.44945	2.62523	28.3421
myoblast:	1.37234	2.17501	1.93179	2.03016	2.49306	3.80182	2.44218	14.36
avg	1.285	2.44752	2.88534	3.01445	2.7702	2.38246	1.98371	8.76033
max	1.50737	4.5596	4.94945	6.85987	6.46847	4.60256	5.52308	32.6364
min	1.07034	0.934479	1.01003	1.12556	0.532641	0.472991	0	0
*red text indicates fold enrichment >1.5
